# Supplementary material for: Treatment, toxicity, and mortality after subsequent breast cancer in female survivors of childhood cancer
Source: Springer Nature journal article supplement (doi:10.1038/s41467-025-58434-w), 2025-03-31
Supplement: MOESM1 [file 41467_2025_58434_MOESM1_ESM.pdf]

## SUPPLEMENTARY FIGURES

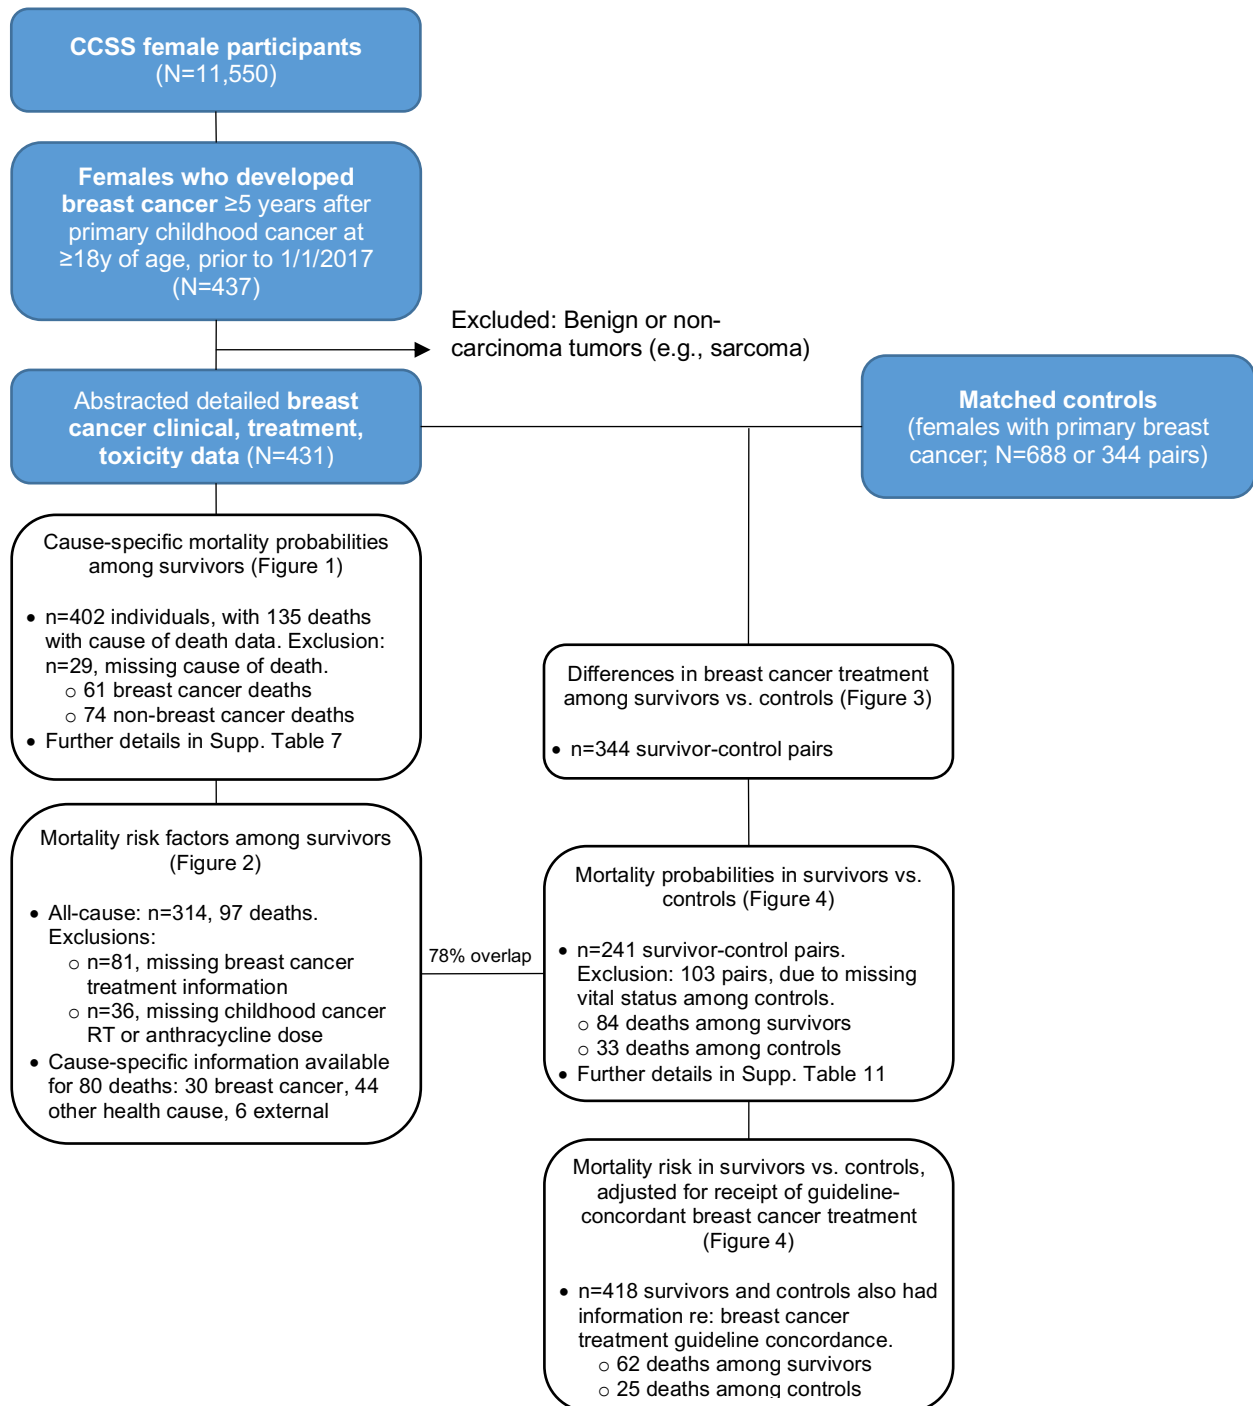

**Supplementary Figure 1:** Overview of participant inclusions and exclusions across all primary analyses.

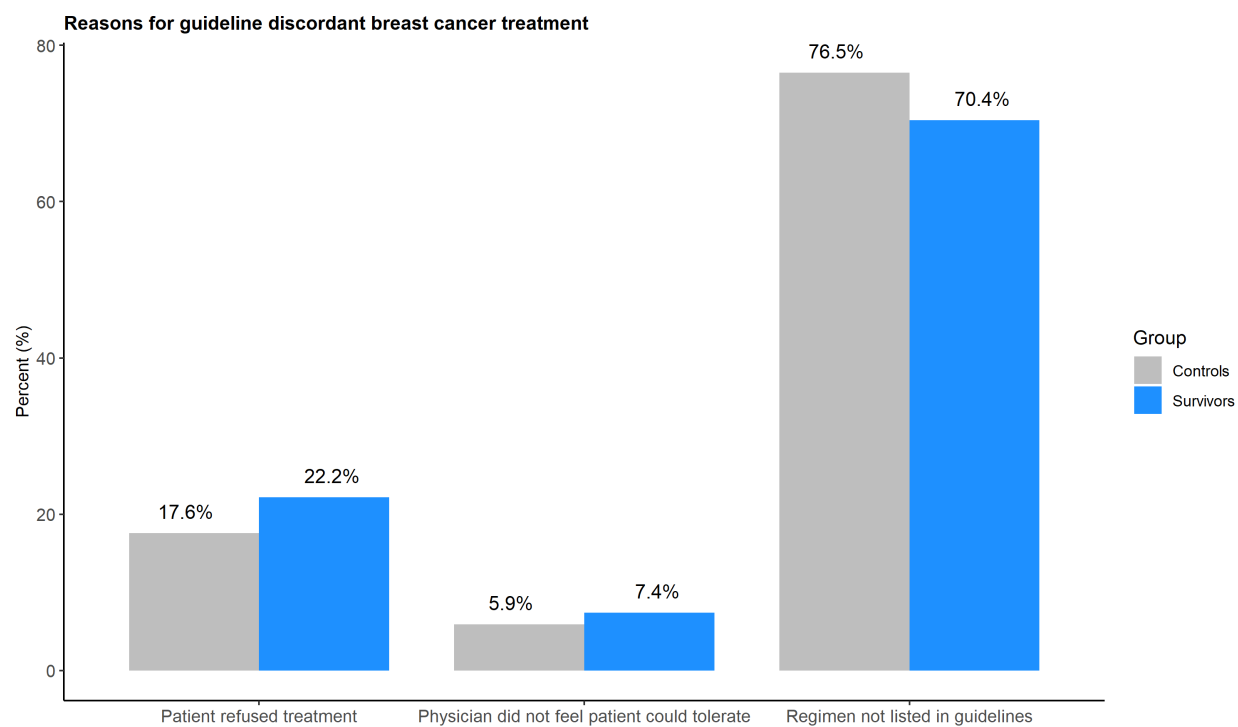

**Supplementary Figure 2:** Reasons for breast cancer guideline discordant treatment among survivors (n=27) and controls (n=17).

## SUPPLEMENTARY TABLES

**Supplementary Table 1:** Non-breast subsequent malignant neoplasms (SMNs) diagnosed before and after breast cancer among childhood cancer survivors.

| Non-BC other SMN type            | Pre BC    | Post BC   |
|----------------------------------|-----------|-----------|
| Acute myeloid leukemia           | 0         | 3         |
| Female genital                   | 1         | 2         |
| Lung and bronchus                | 1         | 8         |
| Lymphoid leukemia                | 1         | 1         |
| Non-Hodgkin lymphoma             | 2         | 3         |
| Other cancers                    | 4         | 5         |
| Other head and neck              | 0         | 2         |
| Other soft tissue sarcomas       | 0         | 4         |
| Parotid gland                    | 2         | 1         |
| Renal neoplasms                  | 2         | 0         |
| Skin                             | 3         | 1         |
| Small intestine and colorectal   | 1         | 4         |
| Thyroid                          | 10        | 5         |
| Unspecified soft tissue sarcomas | 0         | 3         |
| <b>Total</b>                     | <b>27</b> | <b>42</b> |

**Abbreviations:** ALL, acute lymphoblastic leukemia; AML, acute myeloid leukemia; BC, breast cancer; CCSS, Childhood Cancer Survivor Study; NHL, Non-Hodgkin lymphoma; NMSC, nonmelanoma skin cancer; SMN, subsequent malignant neoplasm.

**Note:** 58 CCSS survivors experienced a non-NMSC SMN before or after breast cancer. Above table includes multiple SMNs per survivor. Within this group, primary diagnosis: Hodgkin lymphoma (41); osteosarcoma (6), Ewing sarcoma (4), soft tissue sarcoma (2), ALL (1), AML (1), NHL (1), other leukemia (1), neuroblastoma (1).

**Supplementary Table 2: Primary cancer and breast cancer characteristics among childhood cancer survivors by primary cancer diagnosis group**

|                                                                   | HL (N=251) |                   | Leukemia (N=47) |                   | Sarcoma (N=84) |                   | NHL (N=18) |                   | Other (N=31) |                   |
|-------------------------------------------------------------------|------------|-------------------|-----------------|-------------------|----------------|-------------------|------------|-------------------|--------------|-------------------|
| Characteristic                                                    | N          | % or median (IQR) | N               | % or median (IQR) | N              | % or median (IQR) | N          | % or median (IQR) | N            | % or median (IQR) |
| Age at childhood cancer diagnosis (years)                         | 251        | 16 (14-18)        | 47              | 12 (10-14)        | 84             | 15 (12-16)        | 18         | 14 (11-18)        | 31           | 7 (4-12)          |
| Race                                                              |            |                   |                 |                   |                |                   |            |                   |              |                   |
| White                                                             | 242        | 96.4              | 44              | 94.0              | 79             | 94.0              | 17         | 94.4              | 30           | 96.8              |
| Non-white                                                         | 9          | 3.6               | 3               | 6.0               | 5              | 6.0               | 1          | 5.6               | 1            | 3.2               |
| Treated with chest radiotherapy for childhood cancer <sup>a</sup> | 226        | 96.6              | 12              | 25.2              | 18             | 22.5              | 9          | 56.3              | 14           | 48.3              |
| Received anthracyclines for childhood cancer <sup>b</sup>         | 61         | 25.9              | 29              | 65.1              | 62             | 75.6              | 13         | 76.5              | 9            | 30.0              |
| Age at first breast cancer diagnosis(years)                       | 251        | 40 (35-45)        | 47              | 40 (35-43)        | 84             | 40 (34-44)        | 18         | 39 (35-42)        | 31           | 38 (33-43)        |
| Years between primary and breast cancer diagnosis                 | 251        | 23 (18-29)        | 47              | 26 (23-32)        | 84             | 25 (19-29)        | 18         | 24 (18-30)        | 31           | 28 (22-35)        |
| Breast cancer treatment era                                       |            |                   |                 |                   |                |                   |            |                   |              |                   |
| Before 2000                                                       | 80         | 31.9              | 4               | 8.1               | 19             | 22.6              | 6          | 33.3              | 6            | 19.4              |
| 2000-2009                                                         | 105        | 41.8              | 26              | 52.4              | 40             | 47.6              | 4          | 22.2              | 11           | 35.5              |
| 2010-2019                                                         | 66         | 26.3              | 17              | 39.6              | 25             | 29.8              | 8          | 44.4              | 14           | 45.2              |
| Breast cancer histology <sup>c</sup>                              |            |                   |                 |                   |                |                   |            |                   |              |                   |
| DCIS/LCIS                                                         | 66         | 26.5              | 5               | 10.3              | 20             | 24.1              | 0          | 0                 | 10           | 32.3              |
| Invasive                                                          | 183        | 73.5              | 41              | 89.7              | 63             | 75.9              | 18         | 100               | 21           | 67.7              |
| Vital status                                                      |            |                   |                 |                   |                |                   |            |                   |              |                   |
| Dead                                                              | 111        | 44.2              | 11              | 22.2              | 29             | 34.5              | 5          | 27.8              | 8            | 25.8              |

Abbreviations: HL, Hodgkin lymphoma; NHL, Non-Hodgkin lymphoma; IQR, interquartile range; DCIS/LCIS, ductal carcinoma in situ/lobular carcinoma in situ.

a. Missing chest radiotherapy information (HL: 17; leukemia: 2; sarcoma: 4; NHL: 2; other: 2)

b. Missing anthracycline information (HL: 15; leukemia: 1; sarcoma: 2; NHL: 1; other: 1)

c. Missing breast cancer histology (HL: 2; leukemia: 1; sarcoma: 1)

**Supplementary Table 3: Breast cancer treatments among CCSS survivors only**

|                                                                      | All survivors<br>(N=431) |                         | Chest RT for primary<br>(N=279) |                         | No chest RT for<br>primary (N=125) |                         |
|----------------------------------------------------------------------|--------------------------|-------------------------|---------------------------------|-------------------------|------------------------------------|-------------------------|
| Breast cancer treatment                                              | N                        | % or<br>median<br>(IQR) | N                               | % or<br>median<br>(IQR) | N                                  | % or<br>median<br>(IQR) |
| Prescribed guideline-concordant breast cancer treatment <sup>a</sup> |                          |                         |                                 |                         |                                    |                         |
| No                                                                   | 27                       | 7.5                     | 16                              | 7.0                     | 10                                 | 9.4                     |
| Yes                                                                  | 329                      | 92.5                    | 214                             | 93.0                    | 94                                 | 90.6                    |
| Surgery <sup>b</sup>                                                 |                          |                         |                                 |                         |                                    |                         |
| Underwent surgery for breast cancer                                  | 410                      | 98.1                    | 271                             | 99.3                    | 116                                | 95.96                   |
| Bilateral mastectomy                                                 | 246                      | 60.3                    | 184                             | 67.9                    | 47                                 | 41.84                   |
| Treatment groups <sup>c</sup>                                        |                          |                         |                                 |                         |                                    |                         |
| Mastectomy without RT                                                | 258                      | 69.4                    | 189                             | 77.5                    | 53                                 | 50.29                   |
| Lumpectomy with RT                                                   | 45                       | 12.0                    | 13                              | 5.3                     | 29                                 | 26.21                   |
| Neither                                                              | 70                       | 18.6                    | 42                              | 17.2                    | 26                                 | 23.5                    |
| Hormone modulating therapy                                           |                          |                         |                                 |                         |                                    |                         |
| Among ER+ <sup>d</sup>                                               |                          |                         |                                 |                         |                                    |                         |
| Any SERM                                                             | 146                      | 54.4                    | 89                              | 53.3                    | 51                                 | 58.2                    |
| Any AI                                                               | 80                       | 29.8                    | 53                              | 31.7                    | 23                                 | 26.24                   |
| Any SERM or AI                                                       | 178                      | 66.3                    | 111                             | 66.5                    | 59                                 | 67.32                   |
| HER2+ therapy                                                        |                          |                         |                                 |                         |                                    |                         |
| Among HER2+ <sup>e</sup>                                             |                          |                         |                                 |                         |                                    |                         |
| Any HER2-targeted therapy                                            | 39                       | 60.9                    | 20                              | 52.6                    | 15                                 | 71.43                   |
| Radiation therapy (RT) <sup>f</sup>                                  |                          |                         |                                 |                         |                                    |                         |
| Received RT                                                          | 99                       | 25.7                    | 41                              | 16.5                    | 52                                 | 45.36                   |
| Cumulative prescribed dose <sup>g</sup>                              |                          |                         |                                 |                         |                                    |                         |
| Median (IQR), Grays                                                  | 79                       | 59 (50-60)              | 31                              | 50 (48-60)              | 43                                 | 60 (52-60)              |
| Chemotherapy <sup>h</sup>                                            |                          |                         |                                 |                         |                                    |                         |
| Received any chemotherapy                                            | 208                      | 53.8                    | 132                             | 52.0                    | 63                                 | 57.26                   |
| Cyclophosphamide                                                     | 139                      | 67.2                    | 90                              | 68.2                    | 42                                 | 68.01                   |
| Any taxanes                                                          | 136                      | 65.8                    | 85                              | 64.4                    | 44                                 | 71.05                   |
| Any anthracyclines                                                   | 96                       | 46.8                    | 64                              | 48.5                    | 28                                 | 46.68                   |
| Fluorouracil                                                         | 55                       | 26.1                    | 33                              | 25.0                    | 16                                 | 24.38                   |
| Methotrexate                                                         | 33                       | 15.7                    | 21                              | 15.9                    | 8                                  | 12.19                   |
| Carboplatin                                                          | 27                       | 12.8                    | 17                              | 12.9                    | 7                                  | 10.66                   |
| Cyclophosphamide/doxorubicin regimens <sup>i</sup>                   |                          |                         |                                 |                         |                                    |                         |
| Cyclophosphamide, doxorubicin                                        | 76                       | 37.3                    | 56                              | 42.4                    | 19                                 | 32.96                   |
| Cyclophosphamide, doxorubicin, and taxane                            | 45                       | 22.6                    | 35                              | 26.5                    | 10                                 | 19.25                   |
| Cyclophosphamide, doxorubicin, and no taxane                         | 31                       | 14.7                    | 21                              | 15.9                    | 9                                  | 13.71                   |

Abbreviations: BC, breast cancer; RT, radiation therapy; HMT, hormone modulating therapy; AI, aromatase inhibitor; SERM, selective estrogen receptor modulator; HER2, human epidermal growth factor receptor 2.

- Missing information in entire sample (n=75) and chest RT-only (n=49) and no chest RT subgroups (n=21).
- Missing surgery information in entire sample (n=13) and chest RT-only (n=6) and no chest RT subgroups (n=4). Bilateral mastectomy proportion only among those treated with surgery for breast cancer only.
- Missing information in entire sample (n=37) and chest RT-only (n=27) and no chest RT subgroups (n=8). Mastectomy refers to unilateral or bilateral mastectomy.
- ER+ disease only, in entire sample (n=266) and chest RT-only (n=167) and no chest RT subgroups (n=85).
- HER+ disease only, in entire sample (n=64) and chest RT-only (n=38) and no chest RT subgroups (n=21).
- RT information missing in entire sample (n=48) and chest RT-only (n=31) and no chest RT subgroups (n=13).
- RT dose information missing in entire sample (n=20) and chest RT-only (n=10) and no chest RT subgroups (n=9).
- Chemotherapy information missing in entire sample (n=42) and chest RT-only (n=25) and no chest RT subgroups (n=13).
- Among those treated with chemotherapy only.

**Supplementary Table 4:** Risk factors influencing breast cancer treatment decisions in childhood cancer survivors.

| Treatment decision                                                                        | Variables                                        | OR (95% CI)        | P                    |
|-------------------------------------------------------------------------------------------|--------------------------------------------------|--------------------|----------------------|
| Prescribed guideline-discordant treatment (n=329, 27 with guideline-discordant treatment) |                                                  |                    |                      |
|                                                                                           | Invasive breast cancer histology                 | 11.62 (1.52-88.98) | 0.018                |
|                                                                                           | Prior subsequent malignant neoplasm              | 2.85 (0.53-15.27)  | 0.22                 |
|                                                                                           | Prior major cardiovascular event                 | 1.16 (0.31-4.38)   | 0.83                 |
|                                                                                           | Any chest RT for primary cancer                  | 1.25 (0.48-3.28)   | 0.64                 |
|                                                                                           | Any anthracyclines for primary cancer            | 4.18 (1.48-11.85)  | 7.1x10 <sup>-3</sup> |
| Not treated with radiotherapy (n=343, 257 not treated)                                    |                                                  |                    |                      |
|                                                                                           | Invasive breast cancer histology                 | 0.24 (0.11-0.55)   | 6.8x10 <sup>-4</sup> |
|                                                                                           | Chest RT for childhood cancer <sup>a</sup>       |                    |                      |
|                                                                                           | Any to 35 Gy                                     | 2.35 (1.20-4.57)   | 0.012                |
|                                                                                           | >35 Gy                                           | 4.87 (2.26-10.50)  | 5.3x10 <sup>-5</sup> |
|                                                                                           | Anthracyclines for childhood cancer <sup>b</sup> |                    |                      |
|                                                                                           | Any to 250 mg/m <sup>2</sup>                     | 0.85 (0.35-2.08)   | 0.72                 |
|                                                                                           | >250 mg/m <sup>2</sup>                           | 0.77 (0.38-1.54)   | 0.46                 |
|                                                                                           | Prior subsequent malignant neoplasm              | 2.09 (0.44-9.98)   | 0.36                 |
|                                                                                           | Prior major cardiovascular event                 | 2.39 (0.85-6.75)   | 0.10                 |
| Not treated with anthracyclines (n=350, 263 not treated)                                  |                                                  |                    |                      |
|                                                                                           | Invasive breast cancer histology                 | 0.10 (0.03-0.29)   | 2.2x10 <sup>-5</sup> |
|                                                                                           | Chest RT for childhood cancer <sup>a</sup>       |                    |                      |
|                                                                                           | Any to 35 Gy                                     | 1.52 (0.72-3.21)   | 0.27                 |
|                                                                                           | >35 Gy                                           | 2.05 (0.96-4.38)   | 0.064                |
|                                                                                           | Anthracyclines for childhood cancer <sup>b</sup> |                    |                      |
|                                                                                           | Any to 250 mg/m <sup>2</sup>                     | 3.06 (1.20-7.77)   | 0.019                |
|                                                                                           | >250 mg/m <sup>2</sup>                           | 5.29 (2.29-12.20)  | 9.3x10 <sup>-5</sup> |
|                                                                                           | Prior subsequent malignant neoplasm              | 4.66 (0.57-37.73)  | 0.15                 |
|                                                                                           | Prior major cardiovascular event                 | 2.96 (1.05-8.33)   | 0.040                |

Abbreviations: RT, radiation therapy; Gy, Gray; mg, milligrams; m, meters. Multivariable logistic regression models included covariates above and were also adjusted for age at breast cancer diagnosis and breast cancer diagnosis year. P-values are based on two-sided tests.

a. No chest RT is the referent.

b. No anthracyclines is the referent.

**Supplementary Table 5:** Breast cancer treatment decisions among CCSS survivors with prior non-breast subsequent malignancies or history of major cardiovascular events

| Variables                           | N  | Mastectomy<br>without RT | Lumpectomy<br>with RT | Neither  |
|-------------------------------------|----|--------------------------|-----------------------|----------|
| Prior subsequent malignant neoplasm | 21 | 76.2 (16)                | 0                     | 23.8 (5) |
| Prior major cardiovascular event    | 44 | 79.6 (35)                | 0                     | 20.5 (9) |

**Supplementary Table 6: Vital status by breast cancer stage among CCSS survivors**

|                        | All survivors<br>(N=431)                  |       | LCIS/DCIS (N=101)                              |       | Stage I/II (N=232)               |       | Stage III/IV (N=48)                     |       |
|------------------------|-------------------------------------------|-------|------------------------------------------------|-------|----------------------------------|-------|-----------------------------------------|-------|
|                        | N                                         | %     | N                                              | %     | N                                | %     | N                                       | %     |
| Vital status           |                                           |       |                                                |       |                                  |       |                                         |       |
| Alive                  | 267                                       | 62.2  | 74                                             | 73.27 | 155                              | 67.18 | 16                                      | 33.33 |
| Dead                   | 164                                       | 37.8  | 27                                             | 26.73 | 77                               | 32.82 | 32                                      | 66.67 |
| Cause                  | N=135                                     |       | N=24                                           |       | N=59                             |       | N=27                                    |       |
| Breast cancer          | 61                                        | 45.2  | 4                                              | 16.67 | 25                               | 42.37 | 19                                      | 70.37 |
| Other SN               | 26                                        | 19.3  | 6                                              | 25.00 | 11                               | 18.64 | 2                                       | 7.41  |
| Recurrence             | 8                                         | 5.9   | 3                                              | 12.50 | 4                                | 6.78  | 0                                       | 0     |
| Cardiovascular         | 20                                        | 14.8  | 5                                              | 20.83 | 11                               | 18.64 | 2                                       | 7.41  |
| Other health condition | 11                                        | 8.2   | 2                                              | 8.33  | 5                                | 8.47  | 2                                       | 7.41  |
| External               | 9                                         | 6.7   | 4                                              | 16.67 | 3                                | 5.08  | 2                                       | 7.41  |
|                        | Lumpectomy with<br>radiotherapy<br>(N=45) |       | Mastectomy* without<br>radiotherapy<br>(N=258) |       | ER+ disease,<br>no HMT<br>(N=88) |       | ER+ disease,<br>received HMT<br>(N=178) |       |
|                        | N                                         | %     | N                                              | %     | N                                | %     | N                                       | %     |
| Vital status           |                                           |       |                                                |       |                                  |       |                                         |       |
| Alive                  | 34                                        | 75.56 | 171                                            | 66.62 | 63                               | 72.4  | 120                                     | 67.4  |
| Dead                   | 11                                        | 24.44 | 87                                             | 33.38 | 25                               | 27.6  | 58                                      | 32.6  |
| Cause                  | N=8                                       |       | N=68                                           |       | N=19                             |       | N=43                                    |       |
| Breast cancer          | 3                                         | 37.50 | 21                                             | 30.88 | 11                               | 57.9  | 17                                      | 39.5  |
| Other SN               | 3                                         | 37.50 | 14                                             | 20.59 | 3                                | 15.8  | 12                                      | 27.9  |
| Recurrence             | 0                                         | 0.00  | 6                                              | 8.82  | 2                                | 10.5  | 3                                       | 7.0   |
| Cardiovascular         | 2                                         | 25.00 | 14                                             | 20.59 | 1                                | 5.3   | 5                                       | 11.6  |
| Other health condition | 0                                         | 0.00  | 7                                              | 10.29 | 0                                | 0.0   | 5                                       | 11.6  |
| External               | 0                                         | 0.00  | 6                                              | 8.82  | 2                                | 10.5  | 1                                       | 2.3   |

Abbreviations: SN, subsequent neoplasm; DCIS/LCIS, ductal carcinoma in situ/lobular carcinoma in situ; ER+, estrogen receptor positive; HMT, hormone modulating therapy. \*Mastectomy refers to unilateral or bilateral mastectomy.



**Supplementary Table 7:** Breast cancer- and other cause-specific mortality probabilities among CCSS survivors, stratified by disease histology, guideline-concordant breast cancer treatment receipt, and treatment modality

|                           | N   | Deaths              | 5 years              |                  | 10 years         |                  | 15 years         |                  |
|---------------------------|-----|---------------------|----------------------|------------------|------------------|------------------|------------------|------------------|
|                           |     |                     | Breast cancer        | Other cause      | Breast cancer    | Other cause      | Breast cancer    | Other cause      |
|                           |     |                     | Probability (95% CI) |                  |                  |                  |                  |                  |
| Overall                   | 402 | BC: 61<br>Other: 74 | 0.08 (0.06-0.12)     | 0.03 (0.02-0.05) | 0.14 (0.11-0.18) | 0.11 (0.08-0.15) | 0.19 (0.15-0.24) | 0.19 (0.15-0.25) |
| DCIS/LCIS                 | 98  | BC: 4<br>Other: 20  | 0.01 (0.00-0.07)     | 0.03 (0.01-0.10) | 0.03 (0.01-0.10) | 0.14 (0.08-0.24) | 0.05 (0.02-0.14) | 0.22 (0.14-0.36) |
| Invasive                  | 300 | BC: 57<br>Other: 53 | 0.11 (0.08-0.15)     | 0.03 (0.01-0.05) | 0.17 (0.13-0.22) | 0.10 (0.07-0.14) | 0.23 (0.18-0.29) | 0.18 (0.14-0.25) |
| Guideline-concordant care | 310 | BC: 32<br>Other: 51 | 0.04 (0.02-0.07)     | 0.03 (0.02-0.06) | 0.09 (0.06-0.13) | 0.11 (0.08-0.15) | 0.14 (0.10-0.20) | 0.17 (0.13-0.24) |
| Guideline-discordant care | 23  | BC: 9<br>Other: 4   | 0.30 (0.16-0.56)     | 0                | 0.35 (0.20-0.62) | 0.16 (0.06-0.45) | 0.43 (0.26-0.73) | 0.26 (0.11-0.63) |
| Lumpectomy, RT            | 42  | BC: 3<br>Other: 5   | 0                    | 0                | 0.07 (0.02-0.26) | 0.07 (0.02-0.29) | 0.12 (0.04-0.37) | 0.25 (0.11-0.56) |
| Mastectomy, no RT         | 239 | BC: 21<br>Other: 47 | 0.03 (0.01-0.06)     | 0.02 (0.01-0.05) | 0.07 (0.04-0.12) | 0.11 (0.08-0.17) | 0.12 (0.08-0.18) | 0.19 (0.14-0.26) |
| Neither                   | 84  | BC: 19<br>Other: 15 | 0.19 (0.12-0.3)      | 0.05 (0.02-0.13) | 0.24 (0.16-0.36) | 0.11 (0.06-0.21) | 0.24 (0.16-0.36) | 0.20 (0.12-0.34) |

Abbreviations: DCIS/LCIS, ductal carcinoma in situ/lobular carcinoma in situ; BC, breast cancer; RT, radiation therapy. Mastectomy refers to unilateral or bilateral mastectomy.

**Supplementary Table 8:** Characteristics among CCSS survivors and general population controls

|                                                      | Survivors (N=344) |                   | General population (N=344) |                   |
|------------------------------------------------------|-------------------|-------------------|----------------------------|-------------------|
|                                                      | N                 | % or median (IQR) | N                          | % or median (IQR) |
| Age at first breast cancer diagnosis<br>Median (IQR) | 344               | 41 (36-45)        | 344                        | 42 (37-47)        |
| Treatment year                                       |                   |                   |                            |                   |
| Before 2000                                          | 63                | 18.2              | 56                         | 16.3              |
| 2000-2009                                            | 157               | 45.3              | 146                        | 42.4              |
| 2010-2016                                            | 124               | 36.5              | 142                        | 41.3              |
| Race <sup>a</sup>                                    |                   |                   |                            |                   |
| White                                                | 327               | 95.1              | 237                        | 78.0              |
| Non-White                                            | 17                | 4.9               | 67                         | 22.0              |
| Black                                                | 13                | 3.8               | 48                         | 15.8              |
| Asian/Pacific Islander                               | 2                 | 0.6               | 13                         | 4.3               |
| Other                                                | 2                 | 0.6               | 6                          | 2.0               |
| Stage of first breast cancer <sup>b</sup>            |                   |                   |                            |                   |
| 0                                                    | 81                | 24.1              | 81                         | 24.0              |
| I                                                    | 111               | 33.1              | 113                        | 33.4              |
| II                                                   | 100               | 30.6              | 99                         | 29.3              |
| III                                                  | 31                | 9.2               | 36                         | 10.7              |
| IV                                                   | 10                | 3.0               | 9                          | 2.7               |
| Histology                                            |                   |                   |                            |                   |
| DCIS/LCIS only                                       | 85                | 24.5              | 85                         | 24.7              |
| Invasive                                             | 259               | 75.5              | 259                        | 75.3              |
| Progesterone receptor status <sup>c</sup>            |                   |                   |                            |                   |
| Positive                                             | 197               | 69.2              | 180                        | 65.5              |
| Estrogen receptor status <sup>c</sup>                |                   |                   |                            |                   |
| Positive                                             | 233               | 78.6              | 209                        | 75.2              |
| HER2 status <sup>c</sup>                             |                   |                   |                            |                   |
| Positive                                             | 59                | 25.9              | 57                         | 24.1              |
| Vital status <sup>d</sup>                            |                   |                   |                            |                   |
| Alive                                                | 228               | 66.5              | 208                        | 86.3              |
| Dead                                                 | 116               | 33.5              | 33                         | 13.7              |

Abbreviations: IQR, interquartile range; DCIS/LCIS, ductal carcinoma in situ/lobular carcinoma in situ; HER2, human epidermal growth factor receptor 2.

a. Missing race in 40 controls.

b. Missing breast cancer stage in 11 survivors and 6 controls.

c. Missing breast cancer hormone receptor status and HER2 status, as follows: progesterone receptor status (62 survivors, 69 controls), estrogen receptor status (47 survivors, 66 controls); HER2 status (119 survivors, 107 controls).

d. Missing vital status for 103 controls.

**Supplementary Table 9: Breast cancer treatments among CCSS survivors and matched controls**

| Treatment modality                                                   | Survivors<br>(N=344) |       | General<br>population<br>(N=344) |       | OR    | LL   | UL    | P-value               |
|----------------------------------------------------------------------|----------------------|-------|----------------------------------|-------|-------|------|-------|-----------------------|
|                                                                      | N                    | %     | N                                | %     |       |      |       |                       |
| Prescribed guideline-concordant breast cancer treatment <sup>a</sup> | 291                  | 92.7  | 281                              | 94.3  | 1.23  | 0.59 | 2.56  | 0.58                  |
| Treated with radiation therapy <sup>b</sup>                          | 89                   | 27.6  | 188                              | 61.4  | 0.23  | 0.15 | 0.34  | 2.5x10 <sup>-12</sup> |
| Treated with surgery for breast cancer <sup>c</sup>                  | 336                  | 99.1  | 311                              | 97.8  | 2.33  | 0.60 | 9.02  | 0.22                  |
| Surgical procedures <sup>d</sup>                                     |                      |       |                                  |       |       |      |       |                       |
| Mastectomy                                                           | 272                  | 81.1  | 185                              | 59.5  | 2.71  | 1.87 | 3.93  | 1.5x10 <sup>-7</sup>  |
| Bilateral mastectomy                                                 | 207                  | 61.9  | 73                               | 23.5  | 5.92  | 3.87 | 9.04  | 2.0x10 <sup>-15</sup> |
| Lumpectomy                                                           | 101                  | 29.8  | 148                              | 47.6  | 0.42  | 0.29 | 0.60  | 2.4x10 <sup>-6</sup>  |
| Breast cancer treatment groups <sup>e</sup>                          |                      |       |                                  |       |       |      |       |                       |
| Mastectomy without radiotherapy                                      | 213                  | 65.8  | 108                              | 32.4  | 4.12  | 2.82 | 6.03  | 2.9x10 <sup>-13</sup> |
| Lumpectomy with radiotherapy                                         | 42                   | 12.8  | 122                              | 36.6  | 0.27  | 0.18 | 0.41  | 4.5x10 <sup>-10</sup> |
| Neither of these groups                                              | 70                   | 21.4  | 103                              | 30.9  | 0.59  | 0.40 | 0.87  | 8.3x10 <sup>-3</sup>  |
| Hormone modulating therapy <sup>f</sup>                              |                      |       |                                  |       |       |      |       |                       |
| Any SERM                                                             | 131                  | 55.6  | 142                              | 67.9  | 0.45  | 0.27 | 0.75  | 2.1x10 <sup>-3</sup>  |
| Any AI                                                               | 74                   | 31.4  | 75                               | 35.9  | 0.80  | 0.51 | 1.27  | 0.35                  |
| Any SERM or AI                                                       | 161                  | 68.3  | 164                              | 78.4  | 0.42  | 0.23 | 0.79  | 7.2x10 <sup>-3</sup>  |
| HER2-targeted therapy <sup>g</sup>                                   | 36                   | 61.02 | 37                               | 64.91 | 1.60  | 0.52 | 4.89  | 0.41                  |
| Chemotherapy <sup>h</sup>                                            |                      |       |                                  |       |       |      |       |                       |
| Yes                                                                  | 176                  | 54.5  | 172                              | 55.5  | 0.81  | 0.48 | 1.36  | 0.43                  |
| Cyclophosphamide-doxorubicin regimens <sup>i</sup>                   |                      |       |                                  |       |       |      |       |                       |
| Cyclophosphamide, doxorubicin                                        | 66                   | 38.4  | 104                              | 60.5  | 0.25  | 0.14 | 0.47  | 1.1x10 <sup>-5</sup>  |
| Cyclophosphamide, doxorubicin, taxane                                | 41                   | 24.4  | 72                               | 41.9  | 0.35  | 0.19 | 0.63  | 4.4x10 <sup>-4</sup>  |
| Received cyclophosphamide                                            | 117                  | 67.0  | 130                              | 75.6  | 0.50  | 0.27 | 0.93  | 0.028                 |
| Any taxanes <sup>i</sup>                                             | 125                  | 71.5  | 109                              | 63.4  | 2.33  | 1.07 | 5.09  | 0.033                 |
| Received docetaxel                                                   | 73                   | 40.9  | 38                               | 22.1  | 4.75  | 2.22 | 10.18 | 6.2x10 <sup>-5</sup>  |
| Received paclitaxel                                                  | 55                   | 32.3  | 72                               | 41.9  | 0.49  | 0.27 | 0.87  | 0.015                 |
| Any anthracyclines <sup>i</sup>                                      | 82                   | 47.4  | 114                              | 66.3  | 0.33  | 0.18 | 0.58  | 1.6x10 <sup>-4</sup>  |
| Received doxorubicin                                                 | 74                   | 42.9  | 110                              | 64.0  | 0.27  | 0.14 | 0.49  | 2.1x10 <sup>-5</sup>  |
| Received fluorouracil <sup>i</sup>                                   | 42                   | 23.5  | 15                               | 8.7   | 13.00 | 3.09 | 54.77 | 4.7x10 <sup>-4</sup>  |
| Received methotrexate <sup>i</sup>                                   | 22                   | 12.3  | 8                                | 4.7   | 5.00  | 1.45 | 17.27 | 0.011                 |
| Received carboplatin <sup>i</sup>                                    | 24                   | 13.4  | 14                               | 8.1   | 1.78  | 0.79 | 4.02  | 0.17                  |

Abbreviations: OR, odds ratio; LL, 95% confidence interval lower limit; UL, 95% confidence interval upper limit; AI, aromatase inhibitor; SERM, selective estrogen receptor modulator; HER2, human epidermal growth factor receptor 2. ORs, 95% CIs and p-values (based on two-sided tests) were obtained from univariate conditional logistic regression models comparing the odds of prescribed treatments for survivors with controls.

- Missing information for 30 survivors and 46 controls.
- Missing information for 24 survivors and 38 controls.
- Missing information for 5 survivors and 26 controls.
- Among patients who were treated with surgery for breast cancer. Mastectomy refers to unilateral or bilateral mastectomy unless otherwise specified.
- Missing information for 19 survivors and 11 controls. Mastectomy refers to unilateral or bilateral mastectomy.
- Among 233 survivors and 209 controls with estrogen receptor-positive disease.
- Among 59 survivors and 57 controls with HER2-positive disease.
- Missing information among 19 survivors and 34 controls.
- Among patients who were treated with chemotherapy.

**Supplementary Table 10:** Breast cancer treatment modifications or toxicities among survivors and controls treated with chemotherapy and prescribed guideline-concordant treatment

| Characteristic                        | Controls (N=111) |            | Survivors (N=102) |            | OR<br>(95% CI)    | P                    |
|---------------------------------------|------------------|------------|-------------------|------------|-------------------|----------------------|
|                                       | Total            | % (n)      | Total             | % (n)      |                   |                      |
| Any treatment modification            | 66               | 74.2% (49) | 96                | 76.7% (73) | 1.68 (0.73-3.89)  | 0.22                 |
| Drug omission                         | 74               | 8.1% (6)   | 101               | 21.2% (22) | 4.59 (1.48-14.28) | 8.4x10 <sup>-3</sup> |
| Cycle omission                        | 74               | 8.1% (6)   | 100               | 10.7% (11) | 2.05 (0.60-7.03)  | 0.25                 |
| Received GCSF                         | 66               | 63.6% (42) | 98                | 64.2% (62) | 1.81 (0.84-3.9)   | 0.13                 |
| Delay in treatment                    | 66               | 16.7% (11) | 97                | 13.0% (13) | 0.71 (0.28-1.83)  | 0.48                 |
| Any toxicity                          | 89               | 74.2% (66) | 99                | 86.2% (85) | 2.54 (1.10-5.88)  | 0.029                |
| Fever and neutropenia hospitalization | 81               | 8.6% (7)   | 97                | 17.1% (17) | 2.29 (0.82-6.36)  | 0.11                 |
| Infection                             | 78               | 11.5% (9)  | 97                | 8.0% (8)   | 0.56 (0.20-1.60)  | 0.28                 |
| Surgical complication                 | 99               | 19.2% (19) | 101               | 32.5% (31) | 1.80 (0.90-3.59)  | 0.10                 |
| Cytopenia <sup>a</sup>                | 111              | 8.1% (9)   | 102               | 20.1% (21) | 2.95 (1.21-7.21)  | 0.017                |
| Neurotoxicity <sup>b</sup>            | 111              | 17.1% (19) | 102               | 29.6% (31) | 2.14 (1.04-4.37)  | 0.038                |
| Cardiotoxicity                        | 111              | 3.6% (4)   | 102               | 11.5% (12) | 3.04 (0.85-10.92) | 0.088                |
| Pulmonary toxicity                    | 111              | 3.6% (4)   | 102               | 3.8% (4)   | 0.75 (0.18-3.14)  | 0.69                 |
| Gastrointestinal toxicity             | 111              | 25.2% (28) | 102               | 37.3% (39) | 1.73 (0.92-3.27)  | 0.092                |
| Dermatological toxicity               | 111              | 18.9% (21) | 102               | 22.0% (23) | 1.58 (0.74-3.37)  | 0.24                 |
| Musculoskeletal toxicity              | 111              | 21.6% (24) | 102               | 17.2% (18) | 0.83 (0.4-1.75)   | 0.63                 |

Abbreviations: OR, odds ratio; CI, confidence interval; P, p-value; GCSF, granulocyte colony-stimulating factor. ORs, 95% CIs and p-values (based on two-sided tests) were obtained from logistic regression models comparing the odds of treatment modification or toxicity characteristics for survivors with controls, adjusting for race/ethnicity and breast cancer diagnosis age, year, and histology.

a. Includes anemia, neutropenia, and thrombocytopenia.

b. Includes peripheral neuropathy.

**Supplementary Table 11:** All-cause mortality probabilities in CCSS survivors and matched controls, stratified by breast cancer histology and treatment modality

|         | Entire sample                  |                                 | LCIS/DCIS                    |                                | Invasive                       |                                 |
|---------|--------------------------------|---------------------------------|------------------------------|--------------------------------|--------------------------------|---------------------------------|
|         | Controls<br>(n=241, 33 deaths) | Survivors<br>(n=241, 84 deaths) | Controls<br>(n=63, 3 deaths) | Survivors<br>(n=63, 16 deaths) | Controls<br>(n=178, 30 deaths) | Survivors<br>(n=178, 68 deaths) |
| 5-year  | 0.06 (0.03-0.09)               | 0.13 (0.08-0.17)                | 0.02 (0.00-0.05)             | 0.03 (0.00-0.08)               | 0.08 (0.04-0.12)               | 0.16 (0.10-0.21)                |
| 10-year | 0.08 (0.05-0.11)               | 0.29 (0.22-0.35)                | 0.02 (0.00-0.05)             | 0.17 (0.05-0.27)               | 0.10 (0.06-0.15)               | 0.33 (0.25-0.41)                |
| 15-year | 0.14 (0.09-0.19)               | 0.41 (0.32-0.49)                | 0.02 (0.00-0.05)             | 0.39 (0.19-0.54)               | 0.18 (0.11-0.25)               | 0.42 (0.32-0.50)                |
|         | Mastectomy*, no RT             |                                 | Lumpectomy, RT               |                                | Neither treatment group        |                                 |
|         | Controls<br>(n=80, 4 deaths)   | Survivors<br>(n=147, 44 deaths) | Controls<br>(n=94, 7 deaths) | Survivors<br>(n=29, 8 deaths)  | Controls<br>(n=61, 20 deaths)  | Survivors<br>(n=53, 23 deaths)  |
| 5-year  | 0.02 (0.00-0.06)               | 0.05 (0.02-0.09)                | 0.01 (0.00-0.03)             | 0.04 (0.00-0.11)               | 0.20 (0.09-0.29)               | 0.28 (0.14-0.39)                |
| 10-year | 0.02 (0.00-0.06)               | 0.23 (0.15-0.30)                | 0.02 (0.00-0.05)             | 0.20 (0.00-0.35)               | 0.23 (0.12-0.33)               | 0.43 (0.26-0.56)                |
| 15-year | 0.02 (0.00-0.06)               | 0.32 (0.21-0.41)                | 0.08 (0.01-0.14)             | 0.49 (0.16-0.69)               | 0.39 (0.22-0.52)               | 0.51 (0.31-0.66)                |

Abbreviations: DCIS/LCIS, ductal carcinoma in situ/lobular carcinoma in situ; RT, radiation therapy. \*Mastectomy refers to unilateral or bilateral mastectomy.

**Supplementary Table 12:** All-cause mortality hazard ratios comparing survivors to matched controls, adjusting for key matching variables

| Subgroup                      | HR (95% CI)        | P                    |
|-------------------------------|--------------------|----------------------|
| Entire sample                 | 4.14 (2.44-7.00)   | 1.2x10 <sup>-7</sup> |
| LCIS/DCIS                     | 9.77 (2.04-46.79)  | 4.3x10 <sup>-3</sup> |
| Invasive                      | 3.45 (1.96-6.07)   | 1.8x10 <sup>-5</sup> |
| Mastectomy, no radiotherapy   | 14.70 (3.58-60.42) | 1.9x10 <sup>-4</sup> |
| Lumpectomy, with radiotherapy | 7.77 (2.00-30.20)  | 3.1x10 <sup>-3</sup> |
| Neither treatment group       | 1.73 (0.84-3.55)   | 0.14                 |

Abbreviations: DCIS/LCIS, ductal carcinoma in situ/lobular carcinoma in situ; HR, hazard ratio; CI, confidence interval; P, p-value. All models adjusted for receipt of guideline-discordant care and the following matching variables: first breast cancer diagnosis age and year; race/ethnicity; breast cancer histology (except in LCIS/DCIS and invasive subgroups). Mastectomy refers to unilateral or bilateral mastectomy. P-values are based on two-sided tests.

**Supplementary Table 13:** Risk factors for all-cause mortality among survivors and controls with invasive breast cancer (N=211)

| Variables                                         | HR (95% CI)      | P     |
|---------------------------------------------------|------------------|-------|
| Survivor (vs. control)                            | 2.06 (1.01-4.18) | 0.046 |
| Developed $\geq 1$ acute toxicity (versus none)   | 0.92 (0.41-2.10) | 0.85  |
| Had $\geq 1$ treatment modification (versus none) | 1.45 (0.68-3.10) | 0.34  |

All survivors and controls were treated with chemotherapy and were prescribed guideline-concordant treatment for breast cancer. Multivariable Cox proportional hazards regression model was adjusted for first breast cancer diagnosis age and year and race/ethnicity. P-values are based on two-sided tests.

**Supplementary Table 14:** Overall observed (crude) survival probabilities in all females with first primary breast cancer diagnosed between 1981-2016 at ages 35-49 years with stage information in SEER

| Stage | Matched controls<br>(N=238) | SEER<br>(N=98,488) |                                   |                                    |
|-------|-----------------------------|--------------------|-----------------------------------|------------------------------------|
|       | Stage % (N)                 | Stage % (N)        | 5-year observed survival (95% CI) | 10-year observed survival (95% CI) |
| 0     | 25.6% (61)                  | 21.9% (21,563)     | 99.0 (98.9-99.2)                  | 97.4 (97.1-97.6)                   |
| I-IV  | 74.4% (177)                 | 78.1% (76,925)     | 88.7 (88.4-88.9)                  | 81.4 (81.1-81.7)                   |
| I     | 45.8% (81)                  | 40.8% (31,350)     | 97.2 (97.0-97.4)                  | 93.6 (93.3-93.8)                   |
| II    | 33.9% (60)                  | 39.4% (30,280)     | 91.3 (91.0-91.7)                  | 84.0 (83.5-84.4)                   |
| III   | 16.4% (29)                  | 16.2% (12,494)     | 73.1 (72.3-73.9)                  | 58.9 (58.0-59.8)                   |
| IV    | 4.0% (7)                    | 3.6% (2,801)       | 32.7 (30.9-34.4)                  | 17.1 (15.7-18.6)                   |

SEER database: Incidence - SEER Research Data, 8 Registries, November 2022 (1975-2020). Missing stage information for 3 controls with invasive breast cancer.
