# Supplementary material for: Treatment, toxicity, and mortality after subsequent breast cancer in female survivors of childhood cancer
Source: Nat Commun. 2025 Mar 31;16:3088. doi: 10.1038/s41467-025-58434-w (PMC11958683; doi:10.1038/s41467-025-58434-w)
Supplement: Supplementary file 4 — Source Data [file 41467_2025_58434_MOESM4_ESM.xlsx]

## Sheet: Figure 2
newid	death01	futime	fweight	txyear	BCA1_AGE	BCA1_hist	preBC_anycv	preBC_anysmn	postBC_anysmn	postBC_anycv	SOC	maxchestrtdose	anthdose	anth	RAD_yn
Surv_1	0	6.07529	1	2012	50.3682	Invasive	0	1	0	0	Yes	5000	462.5	0	1
Surv_2	0	11.2088	1	2007	37.3306	Invasive	0	1	0	0	Yes	4500	0	0	0
Surv_4	0	6.68857	1	2012	43.6879	Invasive	0	0	0	0	Yes	4500	0	0	0
Surv_5	0	15.9863	1	2002	40.5175	Invasive	0	0	0	0	Yes	20	0	0	0
Surv_6	0	7.01164	1	2011	45.013	Invasive	0	0	0	0	Yes	4500	0	1	1
Surv_7	0	7.29637	1	2011	40.0903	DCIS_LCIS	0	0	0	0	Yes	0	320	0	0
Surv_8	1	0.887064	1	2000	33.5661	Invasive	0	1	0	0	No	0	458.94	0	0
Surv_9	0	25.8754	1	1992	37.3415	Invasive	0	0	1	0	Yes	4800	0	0	0
Surv_10	1	8.78303	1	2006	46.4887	Invasive	0	0	0	0	Yes	4800	0	1	0
Surv_11	1	1.42094	1	1991	26.5024	Invasive	0	0	0	0	Yes	4500	0	0	1
Surv_12	1	6.04244	1	1995	37.2923	DCIS_LCIS	0	0	1	0	Yes	4500	0	0	0
Surv_13	1	2.83368	1	1992	32.2902	Invasive	0	0	0	0	No	20	449.73	0	1
Surv_15	0	9.11431	1	2009	50.6229	DCIS_LCIS	0	0	0	0	Yes	2400	0	0	0
Surv_16	1	3.55647	1	1991	36.178	Invasive	0	0	0	0	Yes	3500	0	0	1
Surv_18	0	4.28474	1	2014	48.9856	Invasive	0	0	0	0	Yes	4600	0	1	0
Surv_19	0	3.25257	1	2015	53.807	DCIS_LCIS	0	1	0	0	Yes	4500	0	0	0
Surv_20	1	15.0418	1	2002	45.6893	Invasive	1	0	1	0	Yes	4500	0	0	0
Surv_25	0	9.78234	1	2009	28.7748	Invasive	0	0	0	0	Yes	1200	0	1	0
Surv_26	0	10.7105	1	2008	47.1458	Invasive	0	0	0	0	Yes	0	280.24	0	1
Surv_27	0	5.09514	1	2014	45.2293	Invasive	0	0	0	0	Yes	20	142.667	0	0
Surv_28	0	12.6078	1	2006	47.5127	Invasive	0	0	0	0	Yes	0	0	0	0
Surv_31	0	8.33128	1	2011	40.3614	Invasive	0	0	1	0	Yes	200	0	0	1
Surv_32	0	6.97878	1	2012	42.1848	Invasive	0	1	0	0	Yes	1900	0	0	0
Surv_33	0	14.245	1	2005	32.8515	Invasive	1	0	0	0	Yes	4800	0	0	0
Surv_34	0	19.4962	1	1999	26.9897	Invasive	0	0	0	0	Yes	200	405.921	0	0
Surv_35	1	13.9165	1	1998	36.5914	Invasive	0	0	1	0	No	4100	0	1	0
Surv_36	0	9.71663	1	2009	36.8761	Invasive	0	0	0	0	Yes	200	345.333	0	1
Surv_37	0	6.705	1	2012	40.2519	Invasive	0	0	0	0	Yes	200	155.172	0	1
Surv_38	0	8.07666	1	2011	35.6386	DCIS_LCIS	0	0	0	0	Yes	4000	0	0	0
Surv_40	0	5.18823	1	2013	39.8741	Invasive	0	0	0	0	Yes	0	284.375	0	1
Surv_42	0	9.46475	1	2010	50.5435	DCIS_LCIS	0	1	0	0	Yes	3000	0	0	0
Surv_43	0	19.1978	1	2000	34.5161	Invasive	0	0	0	0	Yes	200	0	1	1
Surv_45	0	7.89596	1	2011	44.0548	Invasive	0	0	0	1	Yes	20	665.031	0	1
Surv_46	0	9.23203	1	2010	46.7324	Invasive	0	0	0	0	Yes	0	397.727	0	0
Surv_47	0	9.18549	1	2010	42.527	Invasive	0	0	0	0	Yes	20	0	1	1
Surv_50	0	20.7365	1	1998	40.5366	Invasive	0	0	0	0	Yes	3500	0	1	1
Surv_53	0	10.5024	1	2009	38.5298	Invasive	0	0	0	0	Yes	2000	195.181	0	0
Surv_54	0	6.97604	1	2013	53.0732	DCIS_LCIS	0	0	0	0	Yes	0	470.073	0	0
Surv_55	0	15.1047	1	2004	40.7337	Invasive	0	0	0	0	Yes	3600	0	1	0
Surv_56	0	5.63176	1	2013	45.2923	DCIS_LCIS	0	0	0	0	Yes	2000	198.089	0	0
Surv_57	0	12.4162	1	2007	43.499	Invasive	1	0	0	0	Yes	4800	458.095	0	0
Surv_58	0	8.15058	1	2011	41.0842	Invasive	1	0	0	0	Yes	0	365.854	0	0
Surv_59	0	21.6537	1	1997	30.705	Invasive	0	0	0	0	Yes	2000	0	0	0
Surv_60	1	1.93566	1	2005	40.3203	Invasive	0	0	0	0	Yes	4100	0	1	1
Surv_62	0	9.11978	1	2011	46.3217	Invasive	0	0	0	0	Yes	0	485.072	0	0
Surv_64	1	12.3012	1	2006	51.2772	Invasive	0	0	0	0	No	3600	0	1	0
Surv_65	0	10.2861	1	2010	38.1465	Invasive	0	1	0	0	No	1600	382.192	0	0
Surv_66	1	1.00753	1	2011	41.6756	Invasive	0	0	0	0	Yes	3200	287.692	0	1
Surv_67	0	9.90554	1	2009	34.6831	Invasive	0	0	0	0	No	3300	254.639	0	0
Surv_68	0	11.6988	1	2007	43.6222	Invasive	1	0	0	0	Yes	3600	0	0	0
Surv_69	0	22.245	1	1997	33.2266	Invasive	0	0	0	0	Yes	3500	0	1	0
Surv_70	0	31.6194	1	1987	27.3511	Invasive	0	0	0	0	Yes	3700	0	0	0
Surv_71	0	9.59069	1	2011	49.1663	Invasive	0	0	0	0	Yes	3300	0	0	0
Surv_73	1	11.2444	1	2001	41.5469	DCIS_LCIS	1	0	1	0	Yes	3800	406.41	0	0
Surv_74	1	8.00548	1	2011	49.8316	Invasive	0	0	0	0	Yes	3500	0	0	0
Surv_77	0	16.9582	1	2002	32.1807	DCIS_LCIS	0	0	0	0	Yes	3800	0	0	0
Surv_78	0	17.8754	1	2003	39.2882	Invasive	0	0	1	0	Yes	200	325	0	1
Surv_79	0	14.2368	1	2005	38.3573	Invasive	0	0	0	0	Yes	2000	0	1	1
Surv_80	0	5.37988	1	2013	46.9459	Invasive	1	0	0	0	Yes	3800	0	1	0
Surv_81	1	5.11431	1	1998	40.5476	Invasive	0	0	0	1	Yes	3500	0	1	1
Surv_82	0	11.0445	1	2007	33.4374	DCIS_LCIS	0	0	0	0	Yes	2600	194.512	0	0
Surv_85	0	11.3155	1	2009	34.4695	Invasive	0	0	0	0	Yes	2700	300	0	0
Surv_86	0	10.0507	1	2010	32.1725	Invasive	0	0	0	0	Yes	3600	0	0	0
Surv_87	0	12.9555	1	2005	27.2827	Invasive	0	0	0	0	Yes	2100	141.83	0	0
Surv_88	0	5.19918	1	2013	41.3333	Invasive	0	0	0	0	Yes	3900	0	0	1
Surv_89	0	7.06092	1	2011	35.4606	DCIS_LCIS	0	0	0	0	Yes	2800	146.448	0	0
Surv_90	0	5.70021	1	2013	39.937	Invasive	0	0	0	0	Yes	1500	307.5	0	0
Surv_91	0	8.85421	1	2010	34.8501	DCIS_LCIS	0	1	0	0	Yes	2800	102.837	0	0
Surv_92	0	3.68241	1	2015	40.3669	Invasive	0	0	0	0	Yes	1400	0	0	1
Surv_93	0	6.45038	1	2012	38.2724	Invasive	0	0	0	0	Yes	1400	50.35	0	1
Surv_94	0	5.73854	3.63636	2013	24.5175	Invasive	0	0	0	0	Yes	0	89.014	1	0
Surv_95	0	9.50034	1	2010	34.6913	Invasive	0	0	0	0	Yes	0	198.765	1	0
Surv_96	0	9.97947	1	2009	33.3552	Invasive	0	0	0	0	Yes	2600	310.811	0	0
Surv_97	0	8.60507	1	2011	42.1711	Invasive	0	0	0	0	Yes	0	425.21	1	1
Surv_98	0	9.83162	1	2009	34.0862	DCIS_LCIS	0	0	0	0	Yes	3800	0	0	0
Surv_100	0	6.53799	1	2013	42.5845	DCIS_LCIS	0	0	0	0	Yes	2000	198.673	0	0
Surv_101	1	6.26968	1	2005	26.7077	Invasive	0	0	1	0	Yes	0	431.737	0	1
Surv_102	1	2.70226	1	2014	46.8857	Invasive	1	0	0	0	Yes	1400	0	1	1
Surv_103	1	9.59343	1	2011	54.026	Invasive	1	0	0	0	Yes	3500	0	0	0
Surv_104	1	12.167	1	2000	30.9185	Invasive	0	0	0	0	Yes	1400	0	1	0
Surv_107	1	6.52977	1	2002	35.5318	Invasive	0	0	0	0	Yes	20	0	1	1
Surv_109	0	4.91718	1	2014	48.4216	Invasive	0	0	0	0	Yes	3900	0	0	0
Surv_111	0	13.7166	1	2005	28.7967	DCIS_LCIS	0	0	0	0	Yes	2100	159.038	0	0
Surv_113	1	17.8782	1	1995	35.9726	Invasive	0	0	0	0	Yes	3600	0	0	0
Surv_115	1	7.33744	1	2009	39.5729	Invasive	0	0	0	0	Yes	4000	0	0	1
Surv_116	1	12.7803	1	2007	47.9261	DCIS_LCIS	0	0	0	0	Yes	3900	0	0	1
Surv_117	0	18.601	1	2001	35.4333	Invasive	0	0	0	0	Yes	0	330.556	0	1
Surv_118	1	4.15332	1	2002	44.9774	Invasive	0	0	0	0	Yes	3600	0	1	1
Surv_119	0	11.8549	1	2007	31.666	Invasive	0	0	0	0	Yes	0	0	1	0
Surv_121	0	7.16496	1	2012	43.9562	DCIS_LCIS	0	0	0	0	Yes	20	0	0	0
Surv_124	0	17.3251	1	2002	48.8159	Invasive	0	0	0	0	Yes	1500	0	1	0
Surv_125	0	9.63997	1	2010	48.4189	Invasive	0	0	0	0	Yes	0	0	0	0
Surv_126	0	16.5175	1	2003	43.9124	Invasive	0	0	0	0	Yes	1500	0	1	0
Surv_127	0	15.6687	1	2004	48.1834	Invasive	0	0	0	0	Yes	3600	0	1	0
Surv_131	0	19.781	1	1999	37.2019	DCIS_LCIS	0	0	0	0	Yes	3500	0	0	0
Surv_132	0	10.7598	1	2008	46.1136	Invasive	0	0	1	0	Yes	2600	0	0	0
Surv_133	0	19.7892	1	1999	44.1396	Invasive	0	0	0	0	Yes	3800	0	1	0
Surv_134	0	8.99658	1	2010	45.2649	Invasive	0	0	0	0	Yes	1500	0	1	1
Surv_135	0	11.9535	1	2007	47.1869	DCIS_LCIS	1	1	0	0	Yes	4000	0	0	1
Surv_136	1	11.5565	1	2001	42.8446	DCIS_LCIS	0	0	0	0	Yes	2700	0	0	0
Surv_137	0	8.87885	1	2010	49.2101	DCIS_LCIS	0	0	0	0	Yes	0	0	0	1
Surv_138	0	14.8501	1	2004	52.9884	Invasive	0	0	0	0	Yes	3600	0	0	0
Surv_139	0	18.0534	1	2001	35.2444	Invasive	0	0	1	0	Yes	3800	0	0	0
Surv_140	0	8.19986	1	2011	52.1396	Invasive	0	0	0	0	Yes	3800	0	0	0
Surv_141	0	10.7406	1	2008	35.5674	Invasive	0	0	0	0	Yes	1500	175.61	0	1
Surv_142	0	23.039	1	1996	37.9493	Invasive	1	0	0	0	Yes	3100	0	0	0
Surv_143	0	7.64682	1	2012	58.7543	Invasive	0	0	1	1	Yes	3600	0	0	0
Surv_144	0	11.5729	1	2008	41.7495	Invasive	0	0	0	0	Yes	200	0	1	0
Surv_145	1	22.8583	1	1991	36.7009	Invasive	0	0	0	1	Yes	3800	0	0	0
Surv_146	0	9.90554	1	2009	50.2916	Invasive	0	0	0	0	Yes	0	0	0	1
Surv_147	0	6.11088	1	2013	44.7173	Invasive	0	0	0	0	Yes	0	0	0	1
Surv_148	1	8.00274	1	2000	42.1793	Invasive	0	0	0	0	Yes	20	0	1	0
Surv_150	1	5.41273	1	2005	45.4155	Invasive	1	1	0	0	Yes	4000	0	1	0
Surv_151	0	19.4114	1	2000	42.4449	Invasive	0	0	0	0	Yes	200	0	1	0
Surv_152	1	15.6249	1	2003	47.0418	Invasive	0	0	1	0	Yes	4000	0	1	0
Surv_153	1	1.88364	1	2007	41.9192	Invasive	1	0	0	0	No	20	0	0	0
Surv_154	0	14.1054	1	2005	40.5257	Invasive	0	0	0	0	No	20	333.333	0	1
Surv_156	1	4.35866	1	2016	40.7255	Invasive	0	0	0	0	Yes	0	0	0	1
Surv_157	1	16.846	1	1997	37.6947	Invasive	0	0	0	0	Yes	1500	0	1	0
Surv_158	0	6.38467	1	2013	42.809	DCIS_LCIS	0	0	0	0	Yes	0	0	0	0
Surv_159	1	3.62218	1	1995	30.2998	Invasive	0	0	0	0	Yes	20	213.187	0	0
Surv_160	0	8.01095	1	2011	48.7392	DCIS_LCIS	1	0	0	0	Yes	20	171.875	0	1
Surv_161	0	6.6475	1	2013	40.3285	Invasive	0	0	0	0	Yes	20	211.94	0	1
Surv_162	0	5.01848	1	2014	45.525	Invasive	0	0	0	0	Yes	20	421.348	0	0
Surv_164	0	9.40726	1	2010	49.5934	Invasive	0	0	1	0	Yes	3600	0	0	0
Surv_165	1	9.69473	1	2005	41.0157	Invasive	0	0	0	0	Yes	20	268.085	1	1
Surv_166	0	11.718	1	2008	41.2594	Invasive	0	0	0	0	Yes	200	292.857	0	0
Surv_167	0	5.99863	1	2013	45.2485	Invasive	0	0	0	0	Yes	1800	0	0	0
Surv_170	0	23.05	1	1996	24.6051	Invasive	1	0	0	0	Yes	4200	227.586	0	0
Surv_171	0	20.6598	1	1999	28.9227	Invasive	0	0	0	0	Yes	20	121.743	0	1
Surv_172	0	8.60233	1	2011	38.2806	DCIS_LCIS	0	0	0	0	Yes	20	424.667	0	1
Surv_173	1	9.21013	1	2010	30.924	Invasive	1	0	0	0	Yes	1200	67.5	0	0
Surv_174	0	4.38604	1	2015	39.1759	DCIS_LCIS	0	1	0	0	Yes	1400	0	0	0
Surv_175	0	10.3518	1	2008	42.5654	Invasive	0	0	1	0	Yes	1020	217.647	0	0
Surv_176	0	8.32033	1	2011	44.1232	DCIS_LCIS	0	0	0	0	Yes	20	0	0	0
Surv_177	0	9.02396	1	2010	40.104	DCIS_LCIS	0	0	0	0	Yes	0	360	0	0
Surv_181	1	16.1424	1	1999	46.3491	DCIS_LCIS	0	0	0	1	Yes	3200	0	0	0
Surv_182	1	8.32307	1	1995	41.7687	Invasive	1	0	0	0	No	4500	0	0	0
Surv_184	0	19.896	1	1999	49.5989	DCIS_LCIS	0	1	0	1	Yes	3900	0	0	0
Surv_185	0	12.1205	1	2007	49.8179	Invasive	0	0	0	1	Yes	1200	83.333	0	1
Surv_187	0	10.2752	1	2008	40.23	Invasive	0	0	0	0	Yes	20	252.439	0	1
Surv_188	1	3.79192	1	2000	34.7433	Invasive	0	0	0	0	Yes	0	0	1	1
Surv_189	0	2.19849	1	2016	47.4552	DCIS_LCIS	0	0	0	0	Yes	0	361.364	0	0
Surv_190	0	25.1581	1	1993	31.2854	Invasive	0	0	0	0	Yes	0	584	0	0
Surv_191	1	8.95551	1	2002	43.3593	Invasive	0	0	0	1	Yes	3500	0	1	0
Surv_193	0	13.3279	1	2006	36.1287	Invasive	0	0	0	0	Yes	3400	313.253	0	1
Surv_194	0	9.14442	1	2010	41.7796	Invasive	0	0	0	0	Yes	20	188.372	0	1
Surv_195	0	8.79398	1	2011	37.5989	Invasive	0	0	0	0	Yes	2400	0	0	0
Surv_197	0	17.9603	1	2001	34.2396	Invasive	0	0	0	0	Yes	0	0	1	0
Surv_199	0	10.9952	1	2008	32.6078	DCIS_LCIS	0	0	0	0	Yes	2800	195.181	0	0
Surv_200	1	6.99247	1	2011	57.5688	Invasive	1	0	0	0	Yes	4600	0	0	0
Surv_201	1	4.10404	1	2007	52.5476	Invasive	0	1	0	0	Yes	4500	0	0	0
Surv_202	0	3.81656	1	2014	46.6229	Invasive	0	0	0	0	Yes	3500	0	1	1
Surv_204	0	18.6886	1	2001	35.6742	Invasive	0	0	0	1	Yes	0	433.846	1	1
Surv_205	0	10.1547	1	2009	39.9918	Invasive	0	0	0	0	Yes	4000	0	0	0
Surv_206	0	3.23888	1	2016	41.0157	Invasive	0	0	0	0	Yes	20	0	1	1
Surv_207	0	13.4702	1	2006	40.8104	Invasive	0	0	0	0	Yes	200	297.183	1	0
Surv_208	0	6.45038	1	2013	40.9227	Invasive	0	0	1	0	Yes	0	359.259	0	0
Surv_209	0	8.18344	1	2011	43.1513	DCIS_LCIS	0	0	0	0	Yes	3600	293.631	0	0
Surv_210	0	20.5777	1	1999	47.3238	Invasive	0	0	0	0	Yes	0	0	1	0
Surv_211	0	7.54004	1	2012	53.8672	Invasive	0	0	0	0	Yes	4500	0	0	0
Surv_212	0	33.5387	1	1986	27.5017	Invasive	0	0	0	0	Yes	4000	0	0	0
Surv_213	0	11.937	1	2007	47.9343	DCIS_LCIS	1	0	0	0	Yes	4900	0	0	0
Surv_215	0	6.03422	1	2013	50.0862	Invasive	0	1	0	0	Yes	4100	0	0	0
Surv_216	0	12.8679	1	2006	42.1246	Invasive	0	0	0	0	Yes	4300	0	0	0
Surv_217	1	17.3142	1	1998	34.5599	Invasive	0	0	0	0	Yes	4000	253.333	0	0
Surv_218	0	17.1964	1	2002	37.0568	DCIS_LCIS	0	0	0	0	Yes	4300	145.665	0	0
Surv_221	1	3.20876	1	2011	41.963	Invasive	0	0	0	0	Yes	3900	0	1	0
Surv_222	0	10.2806	1	2009	37.588	Invasive	1	0	0	0	Yes	0	59.848	0	0
Surv_223	1	0.720055	1	2012	43.1732	Invasive	0	0	0	0	Yes	20	0	1	1
Surv_224	0	7.9781	1	2011	39.1129	DCIS_LCIS	0	0	0	0	Yes	4100	0	0	0
Surv_225	0	25.0732	1	1994	30.0452	DCIS_LCIS	0	0	0	1	Yes	3600	0	0	0
Surv_229	0	7.21424	1	2012	22.9076	Invasive	0	0	0	0	Yes	0	356.977	0	1
Surv_230	0	3.96441	1	2015	31.7481	Invasive	0	1	0	0	Yes	0	387.273	0	0
Surv_233	0	4.64887	1	2014	32.0192	Invasive	0	0	0	0	Yes	2200	210.897	0	0
Surv_234	0	19.5072	1	2000	34.8474	Invasive	0	0	0	0	Yes	5000	0	1	0
Surv_235	1	3.04449	1	2008	33.6893	Invasive	0	0	0	0	Yes	4000	0	0	0
Surv_236	0	19.6605	1	2000	40.4353	DCIS_LCIS	0	0	0	0	Yes	1800	0	0	0
Surv_239	0	14.1848	1	2005	37.6208	DCIS_LCIS	0	0	0	0	Yes	2500	0	0	1
Surv_240	0	7.56468	1	2012	48.3121	Invasive	0	0	1	0	Yes	0	515.625	0	0
Surv_241	1	7.42779	1	2011	39.499	Invasive	0	0	0	0	Yes	0	278.182	0	1
Surv_242	0	18.0068	1	2001	37.191	Invasive	0	0	0	0	Yes	1400	0	1	1
Surv_243	1	4.3614	1	2011	49.6235	DCIS_LCIS	0	1	0	0	Yes	4100	0	0	0
Surv_245	0	20.7556	1	1999	40.7173	Invasive	0	0	0	0	Yes	4100	0	1	0
Surv_246	1	6.45038	1	1993	36.115	DCIS_LCIS	0	1	0	0	Yes	3900	0	0	0
Surv_247	0	17.7467	1	2002	44.2628	DCIS_LCIS	0	0	0	0	Yes	4100	0	0	0
Surv_248	0	7.7399	1	2012	48.6188	Invasive	0	0	0	0	Yes	3700	0	0	0
Surv_251	0	26.9158	1	1992	34.0479	DCIS_LCIS	0	0	1	0	Yes	0	0	1	0
Surv_252	1	5.69199	1	1999	44.3231	DCIS_LCIS	0	0	0	0	Yes	4100	0	0	0
Surv_253	1	1.577	1	2009	28.9446	Invasive	0	0	0	0	No	2100	210.108	0	0
Surv_257	0	7.67967	1	2012	40.1506	DCIS_LCIS	0	0	0	0	Yes	1200	293.671	0	0
Surv_258	1	8.26557	1	2005	22.9569	Invasive	0	0	0	0	Yes	0	201.361	1	0
Surv_260	0	13.7029	1	2006	24.8816	DCIS_LCIS	0	0	0	0	Yes	1700	286.301	0	0
Surv_261	0	3.47981	1	2016	39.4497	Invasive	0	0	0	0	Yes	1200	198.693	0	1
Surv_264	0	14.4175	1	2004	38.7296	Invasive	0	0	0	1	Yes	5000	0	1	0
Surv_265	1	12.4709	1	1995	31.8439	Invasive	0	0	0	0	Yes	3500	0	0	0
Surv_267	1	18.2642	1	2001	36.8214	Invasive	0	0	0	0	No	0	585.484	0	0
Surv_268	0	9.12252	1	2009	22.475	Invasive	0	0	0	0	Yes	0	478.521	0	0
Surv_269	1	18.6804	1	1998	44.1287	Invasive	0	0	0	0	Yes	4400	0	0	0
Surv_270	0	5.45654	1	2013	51.3238	Invasive	0	0	0	0	No	5000	0	0	0
Surv_271	0	5.05407	1	2013	46.2177	Invasive	0	0	0	0	Yes	4400	0	0	0
Surv_272	0	22.6776	1	1996	38.6174	DCIS_LCIS	0	0	1	0	Yes	4400	0	1	0
Surv_273	0	16.2464	1	2002	44.3313	Invasive	0	0	0	0	Yes	4400	0	0	0
Surv_274	0	17.5414	1	2001	35.5236	DCIS_LCIS	0	0	0	0	Yes	3600	0	0	0
Surv_275	1	9.85352	1	2004	37.0513	Invasive	0	0	1	0	No	1500	349.789	0	1
Surv_276	1	6.52704	1	2008	43.5729	Invasive	0	0	0	0	Yes	4400	0	0	1
Surv_277	0	5.1937	1	2013	46.8008	Invasive	1	0	0	0	Yes	3000	0	0	0
Surv_279	1	17.9357	1	1997	35.2225	DCIS_LCIS	0	0	0	1	Yes	5000	0	0	0
Surv_280	0	18.0014	1	2000	42.1383	Invasive	0	0	1	0	No	4600	0	0	0
Surv_281	0	18.4559	1	2000	40.7146	Invasive	0	0	0	0	Yes	5100	0	0	0
Surv_282	1	6.06434	1	2010	56.0329	Invasive	1	0	0	0	Yes	4400	0	0	0
Surv_284	0	23.8111	1	1994	35.3676	Invasive	0	0	0	0	Yes	3600	0	0	0
Surv_286	0	22.4942	1	1996	37.2238	DCIS_LCIS	0	0	0	0	Yes	4400	0	0	0
Surv_290	0	6.01506	1	2012	50.6064	Invasive	0	0	0	0	Yes	4400	0	0	0
Surv_291	0	28.6324	1	1990	35.6742	Invasive	0	0	0	0	Yes	4400	0	0	0
Surv_292	1	15.5729	1	2001	49.6318	Invasive	0	0	1	1	Yes	4400	0	1	0
Surv_293	1	6.39288	1	2001	39.551	DCIS_LCIS	1	0	0	0	Yes	4400	0	0	0
Surv_296	0	20.8734	1	1997	37.1581	DCIS_LCIS	0	0	0	0	Yes	20	0	0	0
Surv_297	1	9.28953	1	1994	32.23	DCIS_LCIS	0	0	0	0	Yes	4500	221.875	0	0
Surv_300	0	18.5873	1	2000	36.9254	DCIS_LCIS	0	0	1	0	Yes	4400	0	0	0
Surv_301	0	16.1533	1	2002	30.8802	Invasive	0	0	0	0	Yes	20	81.429	1	0
Surv_302	1	8.06023	1	2004	45.3717	Invasive	0	0	1	0	No	4400	0	0	0
Surv_303	0	18.4422	1	2000	36.4682	Invasive	0	0	0	0	Yes	4800	0	1	0
Surv_305	0	5.34428	1	2013	43.9699	Invasive	0	0	0	0	No	4400	0	0	0
Surv_306	1	7.64682	1	1995	35.0664	Invasive	0	0	0	0	Yes	4400	0	0	0
Surv_307	0	8.846	1	2010	47.2361	Invasive	1	0	0	0	Yes	5000	0	0	0
Surv_308	0	3.07187	1	2015	43.5154	Invasive	0	0	0	0	Yes	20	0	0	1
Surv_309	1	3.67693	1	2006	41.9028	DCIS_LCIS	0	0	0	0	Yes	5000	0	0	0
Surv_310	1	18.6639	1	2000	37.7769	Invasive	0	0	1	0	Yes	5100	0	1	0
Surv_311	0	19.2799	1	1999	33.0459	DCIS_LCIS	0	0	0	0	Yes	5600	0	0	0
Surv_312	1	9.61533	1	2003	52.7858	Invasive	0	0	0	0	Yes	4400	0	1	0
Surv_314	1	4.22724	1	2012	54.0342	Invasive	1	0	0	0	Yes	5000	0	1	0
Surv_315	1	7.09377	1	2000	37.024	DCIS_LCIS	0	0	0	0	Yes	4500	0	1	0
Surv_316	0	16.7146	1	2002	40.052	DCIS_LCIS	0	0	0	0	Yes	4400	0	0	0
Surv_317	0	14.0862	1	2005	40.0219	Invasive	1	0	0	0	Yes	0	194.853	0	0
Surv_318	0	13.9822	1	2005	32.0274	DCIS_LCIS	0	0	0	0	Yes	2500	94.937	0	0
Surv_319	0	8.65982	1	2010	35.3621	Invasive	0	0	0	0	Yes	2600	159.677	1	0
Surv_322	0	14.987	1	2004	42.5736	DCIS_LCIS	1	0	0	0	Yes	0	465	0	0
Surv_324	0	8.83231	1	2010	40.6708	Invasive	0	0	0	0	Yes	3000	0	0	0
Surv_327	0	17.9329	1	2001	41.8782	Invasive	0	0	0	0	Yes	3100	0	1	1
Surv_328	1	5.55236	1	2003	38.7324	Invasive	0	0	1	1	Yes	4200	0	1	0
Surv_330	1	14.9569	1	2003	48.6461	Invasive	0	0	0	0	Yes	3800	0	0	1
Surv_331	0	7.71253	1	2011	48.4709	Invasive	1	0	1	0	Yes	4300	0	0	0
Surv_332	1	0.933607	1	2013	49.6591	Invasive	0	0	0	0	Yes	200	469.481	0	0
Surv_333	0	11.5373	1	2007	33.3908	Invasive	0	0	0	0	Yes	4400	0	1	0
Surv_334	1	8.66804	1	2005	30.4422	DCIS_LCIS	0	0	0	0	Yes	3400	84.672	0	0
Surv_337	0	15.0418	1	2004	31.7591	Invasive	0	0	0	0	Yes	0	291.429	0	1
Surv_339	0	6.31348	1	2012	30.3272	DCIS_LCIS	0	0	0	0	Yes	0	446.154	0	0
Surv_340	0	6.7269	1	2012	30.1164	DCIS_LCIS	0	0	0	0	Yes	4200	150.289	0	0
Surv_341	1	4.41342	1	2010	30.6694	Invasive	0	0	0	0	Yes	0	163.077	0	1
Surv_342	1	0.147844	1	2007	29.013	Invasive	0	0	0	0	No	0	416.892	0	0
Surv_344	1	14.9487	1	1996	31.1814	Invasive	0	0	0	0	Yes	4500	0	1	0
Surv_346	0	21.9658	1	1997	45.5332	DCIS_LCIS	0	0	0	1	Yes	3700	0	0	0
Surv_347	0	22.8227	1	1996	36.0849	Invasive	0	0	0	0	Yes	1500	333.333	1	0
Surv_348	1	4.50376	1	2011	56.5969	Invasive	1	0	0	0	Yes	4000	0	1	1
Surv_349	1	3.6386	1	1997	39.9918	DCIS_LCIS	0	0	0	0	No	3800	253.892	0	0
Surv_350	0	5.10062	1	2014	49.1581	Invasive	0	0	0	0	Yes	3200	255.652	0	0
Surv_351	0	12.0903	1	2007	47.9206	Invasive	0	0	0	0	Yes	2900	308.571	0	0
Surv_352	0	23.4086	1	1995	33.9959	Invasive	0	0	0	0	Yes	200	185.806	0	1
Surv_354	0	6.11362	1	2013	52.6105	Invasive	1	0	0	0	Yes	3500	0	0	0
Surv_355	0	15.2334	1	2003	45.7413	Invasive	0	0	0	0	Yes	3900	0	1	0
Surv_356	0	18.5791	1	2000	38.7598	Invasive	0	0	0	0	Yes	0	244.898	0	1
Surv_357	0	22.0397	1	1997	36.4709	DCIS_LCIS	0	0	0	1	Yes	2900	290	0	0
Surv_358	0	16.23	1	2002	45.2129	DCIS_LCIS	0	0	0	0	Yes	4000	207.317	0	0
Surv_359	1	7.70157	1	2003	40.3477	Invasive	0	0	0	0	Yes	1500	480	1	1
Surv_361	1	7.88501	1	1998	37.8179	DCIS_LCIS	0	0	0	0	Yes	0	0	0	0
Surv_363	1	23.5127	1	1995	36.2327	Invasive	0	0	1	1	Yes	3700	0	0	0
Surv_364	0	15.6879	1	2003	41.9439	Invasive	0	0	0	0	Yes	3600	0	1	1
Surv_365	0	4.46543	1	2014	54.245	Invasive	0	1	0	0	Yes	3700	0	0	0
Surv_366	0	12.2409	1	2006	44.4819	Invasive	0	0	0	0	Yes	3800	0	0	0
Surv_367	1	11.8905	1	1997	37.8836	Invasive	0	0	0	0	No	200	0	0	1
Surv_368	1	5.34155	1	1998	37.0869	Invasive	1	0	0	0	Yes	2800	183.908	0	0
Surv_372	1	10.4504	1	2004	39.9507	Invasive	0	0	0	0	Yes	3900	200	1	1
Surv_374	0	15.6605	1	2003	35.0308	DCIS_LCIS	0	0	0	0	Yes	0	609.15	0	0
Surv_375	0	17.2156	1	2002	36.2628	Invasive	0	0	1	0	Yes	3700	0	0	0
Surv_376	0	4.38604	1	2014	48.7775	Invasive	0	0	0	0	Yes	4000	0	0	0
Surv_377	1	11.6632	1	1997	47.2115	Invasive	1	0	0	0	Yes	3500	0	0	1
Surv_379	0	18.3984	1	2000	42.935	Invasive	0	0	0	0	Yes	20	0	0	0
Surv_381	1	25.1006	1	1989	38.7461	DCIS_LCIS	0	0	0	0	Yes	3600	0	0	0
Surv_386	0	11.0527	1	2008	30.6092	Invasive	0	0	0	1	Yes	4000	76.087	0	0
Surv_387	0	10.6064	1	2008	34.1903	Invasive	0	0	0	0	No	0	916.692	0	1
Surv_388	0	10.0561	1	2009	40.5613	DCIS_LCIS	0	0	0	0	Yes	4100	0	0	0
Surv_389	0	7.54552	1	2013	31.4689	Invasive	0	0	0	0	Yes	200	264.151	0	1
Surv_390	0	8.77481	1	2010	47.436	DCIS_LCIS	0	0	0	0	Yes	0	373.333	0	0
Surv_392	0	13.8234	1	2005	40.4627	Invasive	0	0	0	0	No	20	450	0	1
Surv_393	1	13.0048	1	2005	41.9466	Invasive	1	0	0	0	No	3400	396.429	0	0
Surv_394	0	6.71321	1	2012	47.5236	Invasive	0	0	0	0	Yes	2400	360	0	0
Surv_395	0	3.08556	1	2016	49.8864	Invasive	1	0	0	0	Yes	3600	384.868	0	0
Surv_396	1	7.06913	1	2004	33.1663	Invasive	0	0	0	0	No	2400	371.154	1	0
Surv_398	1	15.1348	1	1990	36.4709	DCIS_LCIS	0	0	1	0	Yes	4000	0	0	1
Surv_399	1	24.2546	1	1988	35.8385	Invasive	0	0	0	1	Yes	4000	0	0	1
Surv_400	0	19.5264	1	1999	38.2478	Invasive	0	0	0	0	Yes	3500	0	1	0
Surv_401	0	3.22519	1	2016	46.8693	Invasive	0	0	0	0	Yes	0	294.118	1	1
Surv_405	0	11.1431	1	2009	47.4825	Invasive	0	0	0	0	Yes	0	399.375	0	1
Surv_406	0	11.5592	1	2007	47.0637	Invasive	0	0	0	0	Yes	1920	0	0	0
Surv_408	1	9.67283	1	2007	52.4682	DCIS_LCIS	1	0	0	0	Yes	2000	0	0	0
Surv_412	1	3.62491	1	2004	49.399	Invasive	0	0	0	0	Yes	3900	0	1	0
Surv_413	1	10.8172	1	2003	46.0315	Invasive	0	0	0	0	Yes	0	252.857	1	1
Surv_414	1	11.2827	1	2007	50.872	DCIS_LCIS	0	0	0	1	Yes	3600	0	0	0
Surv_415	1	13.7495	1	2000	38.2806	Invasive	0	0	0	1	Yes	200	447.143	1	0
Surv_416	1	10.6338	1	2001	39.1266	Invasive	0	0	0	0	Yes	2000	548.8	0	1
Surv_417	0	15.9261	1	2003	46.3765	Invasive	0	0	0	0	Yes	0	464	1	1
Surv_418	0	18.2533	1	2001	42.1273	Invasive	0	0	0	1	No	0	668.824	1	1
Surv_420	1	14.8501	1	1998	37.2074	DCIS_LCIS	0	0	0	0	Yes	3700	0	0	0
Surv_421	0	4.12594	1	2015	49.848	DCIS_LCIS	0	0	0	0	Yes	2400	340	0	0
Surv_423	0	5.56331	1	2013	47.2361	DCIS_LCIS	0	0	0	0	Yes	20	396.471	0	1
Surv_424	1	8.70089	1	2003	44.1561	Invasive	0	0	0	1	Yes	4200	0	0	0
Surv_425	0	12.5667	1	2006	39.091	DCIS_LCIS	0	0	0	0	Yes	3600	208.696	0	0
Surv_426	0	7.32923	1	2013	32.6242	Invasive	0	0	0	0	No	2100	207.727	0	0
Surv_427	0	7.21424	1	2013	34.2012	DCIS_LCIS	0	0	1	0	Yes	2100	176.286	0	0
Surv_428	1	5.20192	1	2013	41.2704	Invasive	0	0	0	0	Yes	3600	300	0	0
Surv_429	0	10.2231	1	2010	32.7173	DCIS_LCIS	0	0	0	0	Yes	2400	277.035	0	0
Surv_430	0	8.59138	1	2012	41.4894	Invasive	0	0	0	0	Yes	3600	291.892	0	1
Surv_431	0	8.9117	1	2010	38.3819	DCIS_LCIS	0	0	0	0	Yes	0	295.077	0	0

## Sheet: Figure 3
newid	fweight	txyear	SOC	RAD_yn	mastectomy_yn	doublemast	lumpectomy	estrogen_receptor	progesterone_receptor	ai_serm	chemo_yn2	cyclophos	taxane	anth	antiher2	her2
Surv_1	1	2012	Yes	1	1	1	0	Positive	Positive	1	1	1	1	0	0	Negative
Control_1	1	2012	Yes	1	1	0	0	Negative	Negative	0	1	1	1	1	0	Negative
Surv_2	1	2007	Yes	0	1	1	0	Positive	Positive	1	0	0	0	0	0	Negative
Control_2	1	2007	Yes	0	1	0	1	Positive	Positive	1	1	1	0	1	0	Negative
Surv_3	1	2012	Yes	0	1	1	0	Positive	Positive	0	0	0	0	0	0	Negative
Control_3	1	2012	Yes	1	0	0	1	Positive	Positive	1	0	0	0	0	0	Negative
Surv_4	1	2002	Yes	0	1	0	0	Positive	Positive	1	0	0	0	0	0	Negative
Control_4	1	2003	Yes	1	0	0	1	Positive	Positive	1	0	0	0	0	0	Negative
Surv_5	1	2011	Yes	1	1	1	0	Positive	Positive	1	1	1	1	1	0	Negative
Control_5	1	2010	Yes	1	1	0	1	Positive	Positive	1	1	1	1	1	0	Negative
Surv_6	1	2011	Yes	0	1	0	0	Positive	Positive	0	0	0	0	0	NA	Unknown
Control_6	1	2012	Yes	1	0	0	1	Positive	Positive	1	0	0	0	0	NA	Unknown
Surv_7	1	2000	No	0	1	0	0	Negative	Negative	0	0	0	0	0	1	Positive
Control_7	1	2001	Yes	0	1	1	0	Negative	Negative	0	1	1	0	1	1	Positive
Surv_8	1	1992	Yes	0	1	0	0	Positive	Positive	0	0	0	0	0	NA	Unknown
Control_8	1	1994	Yes	0	1	1	0	Positive	Positive	1	0	0	0	0	0	Negative
Surv_9	1	2006	Yes	0	1	1	0	Positive	Positive	1	1	1	1	1	0	Negative
Control_9	1	2006	Yes	1	0	0	1	Positive	Positive	1	1	1	1	1	0	Negative
Surv_10	1	1992	No	1	1	1	1	Unknown	Unknown	1	1	0	0	0	NA	Unknown
Control_10	1	1993	Yes	0	1	0	0	Unknown	Unknown	1	1	1	0	0	NA	Unknown
Surv_11	1	2000	NA	0	1	0	0	Positive	Positive	1	0	0	0	0	NA	Unknown
Control_11	1	2000	NA	NA	0	0	0	Unknown	Unknown	NA	0	NA	NA	NA	NA	Unknown
Surv_12	1	2009	Yes	0	1	1	1	Positive	Unknown	0	0	0	0	0	NA	Unknown
Control_12	1	2012	Yes	0	1	0	0	Positive	Positive	0	0	0	0	0	NA	Unknown
Surv_13	1	2000	NA	NA	0	0	0	Positive	Positive	0	0	NA	NA	NA	0	Negative
Control_13	1	1998	Yes	1	1	1	0	Positive	Positive	1	1	0	1	1	0	Negative
Surv_14	1	2014	Yes	0	1	1	0	Negative	Negative	0	1	1	1	1	0	Negative
Control_14	1	2014	Yes	1	0	0	1	Negative	Negative	0	1	1	1	0	0	Negative
Surv_15	1	2015	Yes	0	1	1	0	Positive	Positive	0	0	0	0	0	0	Positive
Control_15	1	2015	Yes	0	1	0	0	Positive	Positive	0	0	0	0	0	NA	Unknown
Surv_16	1	2002	Yes	0	1	0	0	Positive	Positive	1	1	1	1	0	1	Positive
Control_16	1	2000	Yes	1	1	0	1	Positive	Positive	1	1	1	0	1	0	Positive
Surv_17	1	2015	NA	NA	0	0	1	Positive	Positive	0	0	NA	NA	NA	0	Negative
Control_17	1	2016	Yes	1	0	0	1	Positive	Positive	1	0	0	0	0	0	Negative
Surv_20	1	2009	Yes	0	1	0	0	Negative	Negative	0	1	1	1	1	0	Negative
Control_20	1	2009	Yes	1	1	1	0	Negative	Negative	0	1	1	1	1	0	Negative
Surv_21	1	2008	Yes	1	1	1	0	Positive	Positive	1	1	0	1	0	1	Negative
Control_21	1	2009	Yes	0	1	1	0	Positive	Positive	1	0	0	0	0	0	Negative
Surv_23	1	2014	Yes	0	1	1	0	Positive	Positive	1	0	0	0	0	0	Negative
Control_23	1	2014	Yes	1	1	0	0	Positive	Positive	1	1	1	1	0	0	Negative
Surv_24	1	2006	Yes	0	1	0	0	Positive	Positive	1	0	0	0	0	0	Negative
Control_24	1	2006	Yes	0	1	0	0	Positive	Positive	0	0	0	0	0	0	Negative
Surv_25	1	2000	Yes	0	0	0	1	Unknown	Unknown	NA	0	0	0	0	NA	Unknown
Control_25	1	1999	Yes	0	1	0	0	Unknown	Unknown	1	0	0	0	0	NA	Unknown
Surv_26	1	2011	Yes	1	0	0	1	Positive	Positive	1	1	1	1	0	0	Negative
Control_26	1	2011	Yes	1	0	0	1	Positive	Positive	1	1	1	1	0	0	Negative
Surv_27	1	2012	Yes	0	1	1	0	Positive	Unknown	1	1	0	1	0	1	Positive
Control_27	1	2012	No	1	0	0	1	Positive	Negative	1	0	0	0	0	0	Positive
Surv_28	1	2005	Yes	0	1	1	0	Positive	Negative	1	1	1	0	0	0	Negative
Control_28	1	2007	Yes	1	0	0	1	Positive	Positive	1	1	1	0	0	0	Negative
Surv_29	1	1999	Yes	0	1	0	0	Negative	Negative	0	1	1	0	0	0	Negative
Control_29	1	1999	Yes	1	0	0	1	Negative	Negative	0	1	1	0	1	0	Negative
Surv_30	1	1998	No	0	1	1	0	Positive	Positive	1	1	0	1	1	0	Negative
Control_30	1	1998	NA	NA	0	0	0	Unknown	Unknown	NA	0	NA	NA	NA	NA	Unknown
Surv_31	1	2009	Yes	1	0	0	1	Positive	Positive	1	1	1	1	0	0	Negative
Control_31	1	2012	Yes	0	1	1	0	Positive	Negative	1	0	0	0	0	0	Negative
Surv_32	1	2012	Yes	1	0	0	1	Negative	Positive	0	1	1	1	0	0	Negative
Control_32	1	2014	Yes	1	0	0	1	Negative	Negative	0	1	1	1	1	0	Negative
Surv_33	1	2011	Yes	0	1	1	0	Positive	Positive	0	0	0	0	0	NA	Unknown
Control_33	1	2011	Yes	1	1	0	1	Positive	Positive	1	0	0	0	0	0	Negative
Surv_34	1	2013	Yes	1	0	0	1	Negative	Negative	0	1	0	1	0	0	Negative
Control_34	1	2014	Yes	1	1	0	0	Positive	Positive	1	1	1	1	1	NA	Unknown
Surv_35	1	2006	Yes	0	1	1	0	Negative	Negative	0	1	0	1	0	1	Positive
Control_35	1	2003	Yes	1	1	0	0	Negative	Negative	0	1	1	1	1	1	Positive
Surv_36	1	2010	Yes	0	0	0	1	Positive	Positive	0	0	0	0	0	NA	Unknown
Control_36	1	2010	Yes	0	1	1	0	Positive	Positive	0	0	0	0	0	NA	Unknown
Surv_37	1	2000	Yes	1	0	0	1	Negative	Negative	0	1	1	0	1	0	Positive
Control_37	1	2000	Yes	1	0	0	1	Positive	Negative	1	1	1	0	1	0	Negative
Surv_38	1	2011	Yes	1	0	0	1	Positive	Positive	1	1	0	1	0	1	Positive
Control_38	1	2012	Yes	1	0	0	1	Positive	Positive	1	1	1	1	1	0	Positive
Surv_39	1	2010	Yes	0	1	0	0	Positive	Positive	1	1	1	1	0	NA	Unknown
Control_39	1	2009	Yes	1	1	1	0	Negative	Negative	1	1	1	1	1	0	Negative
Surv_40	1	2010	Yes	1	0	0	1	Positive	Positive	1	1	1	1	1	1	Positive
Control_40	1	2011	Yes	1	0	0	1	Positive	Positive	1	1	0	1	0	1	Positive
Surv_41	1	1998	Yes	1	0	0	1	Positive	Positive	1	1	1	0	1	0	Positive
Control_41	1	2001	Yes	0	1	0	0	Positive	Positive	1	0	NA	NA	NA	0	Positive
Surv_42	1	2005	Yes	1	0	0	1	Negative	Negative	0	1	0	0	1	1	Positive
Control_42	1	2008	No	1	0	0	0	Negative	Negative	0	1	0	1	0	0	Negative
Surv_43	1	2014	NA	NA	0	0	0	Unknown	Unknown	NA	0	NA	NA	NA	NA	Unknown
Control_43	1	2014	Yes	0	1	1	0	Positive	Positive	1	1	1	1	1	0	Negative
Surv_44	1	2009	Yes	0	1	1	0	Positive	Positive	0	0	0	0	0	0	Negative
Control_44	1	2009	Yes	0	1	0	0	Positive	Positive	1	0	0	0	0	0	Negative
Surv_45	1	2013	Yes	0	1	0	0	Positive	Positive	1	0	0	0	0	NA	Unknown
Control_45	1	2013	Yes	1	0	0	1	Positive	Negative	1	0	0	0	0	NA	Unknown
Surv_46	1	2004	Yes	0	1	1	0	Positive	Positive	1	1	1	1	1	0	Positive
Control_46	1	2005	Yes	1	0	0	1	Positive	Positive	1	1	1	0	1	0	Negative
Surv_47	1	2013	Yes	0	1	1	0	Positive	Negative	0	0	0	0	0	NA	Unknown
Control_47	1	2014	Yes	0	1	1	0	Positive	Negative	0	0	0	0	0	NA	Unknown
Surv_48	1	2007	Yes	0	1	1	0	Positive	Positive	0	0	0	0	0	0	Positive
Control_48	1	2007	Yes	0	1	0	0	Positive	Positive	1	1	1	1	1	1	Positive
Surv_49	1	2011	Yes	0	1	1	0	Positive	Positive	0	0	0	0	0	0	Negative
Control_49	1	2011	Yes	0	1	0	1	Positive	Positive	1	0	0	0	0	0	Negative
Surv_50	1	1997	Yes	0	1	1	1	Positive	Positive	0	1	1	0	0	NA	Unknown
Control_50	1	1997	Yes	0	1	0	0	Positive	Negative	0	1	1	0	1	NA	Unknown
Surv_51	1	2005	Yes	1	1	1	1	Negative	Negative	0	1	1	1	1	0	Negative
Control_51	1	2004	NA	NA	0	0	0	Unknown	Unknown	NA	0	NA	NA	NA	NA	Unknown
Surv_52	1	2011	Yes	0	1	0	1	Negative	Negative	0	1	1	1	0	0	Negative
Control_52	1	2011	Yes	1	0	0	1	Positive	Negative	1	1	1	1	0	0	Negative
Surv_54	1	2010	No	0	1	1	0	Positive	Positive	1	1	0	1	0	0	Negative
Control_54	1	2010	Yes	0	1	0	0	Positive	Positive	1	1	1	1	0	0	Negative
Surv_55	1	2011	Yes	1	1	1	0	Negative	Negative	1	1	0	1	0	1	Positive
Control_55	1	2008	No	1	1	0	0	Negative	Negative	0	1	0	1	0	0	Positive
Surv_56	1	2009	No	0	1	1	0	Positive	Positive	1	0	0	0	0	0	Negative
Control_56	1	2010	Yes	1	0	0	1	Positive	Positive	1	1	1	1	1	0	Negative
Surv_57	1	1997	Yes	0	1	1	0	Negative	Negative	1	1	1	0	1	NA	Unknown
Control_57	1	1997	Yes	0	1	0	0	Negative	Negative	0	1	1	0	1	NA	Unknown
Surv_58	1	2011	Yes	0	1	0	0	Positive	Positive	1	0	0	0	0	0	Negative
Control_58	1	2011	Yes	1	0	0	1	Positive	Positive	1	0	0	0	0	0	Negative
Surv_59	1	2000	NA	NA	1	1	0	Unknown	Unknown	NA	0	NA	NA	NA	NA	Unknown
Control_59	1	2001	Yes	1	1	0	0	Positive	Positive	0	1	0	1	1	0	Positive
Surv_61	1	2011	Yes	0	1	1	0	Positive	Positive	0	0	0	0	0	0	Negative
Control_61	1	2011	Yes	0	1	1	0	Positive	Positive	1	0	0	0	0	0	Negative
Surv_63	1	2002	Yes	1	0	0	1	Positive	Positive	1	1	1	0	0	0	Negative
Control_63	1	2002	Yes	1	1	0	0	Positive	Positive	1	1	1	1	1	0	Negative
Surv_65	1	2003	Yes	1	0	0	0	Positive	Positive	1	1	1	0	0	0	Negative
Control_65	1	2002	Yes	1	1	0	0	Positive	Positive	1	1	1	1	1	0	Positive
Surv_66	1	2005	Yes	1	1	1	0	Positive	Positive	1	1	1	1	1	1	Positive
Control_66	1	2006	Yes	1	0	0	1	Positive	Positive	1	1	1	1	1	0	Negative
Surv_67	1	2013	Yes	0	1	1	0	Positive	Positive	1	1	1	1	1	0	Negative
Control_67	1	2013	Yes	1	1	0	0	Positive	Positive	1	1	1	1	0	0	Negative
Surv_68	1	1998	Yes	1	1	0	0	Positive	Positive	1	1	1	0	1	NA	Unknown
Control_68	1	1999	Yes	0	1	0	0	Positive	Positive	1	1	1	0	1	0	Negative
Surv_70	1	2007	Yes	1	1	1	0	Negative	Negative	0	1	0	1	0	1	Positive
Control_70	1	2012	Yes	1	1	1	0	Negative	Negative	0	1	1	1	1	1	Positive
Surv_71	1	2012	NA	NA	1	1	0	Negative	Positive	0	0	NA	NA	NA	NA	Unknown
Control_71	1	2013	Yes	1	0	0	1	Negative	Negative	0	1	1	1	1	0	Negative
Surv_72	1	2009	Yes	0	1	1	0	Negative	Negative	0	1	0	1	0	0	Negative
Control_72	1	2010	Yes	0	1	1	0	Negative	Negative	0	0	0	0	0	0	Negative
Surv_73	1	2010	Yes	0	1	1	0	Positive	Negative	1	1	1	1	0	0	Negative
Control_73	1	2010	Yes	1	0	0	1	Positive	Positive	1	0	0	0	0	0	Negative
Surv_74	1	2005	Yes	0	1	1	0	Positive	Positive	1	1	0	1	0	1	Positive
Control_74	1	2010	Yes	1	0	0	1	Positive	Positive	1	1	1	1	1	1	Positive
Surv_75	1	2013	Yes	1	0	0	1	Positive	Negative	1	0	0	0	0	0	Negative
Control_75	1	2013	Yes	0	1	1	0	Positive	Positive	1	0	0	0	0	0	Negative
Surv_76	1	2011	Yes	0	1	1	0	Positive	Positive	0	0	0	0	0	NA	Unknown
Control_76	1	2012	Yes	0	0	0	0	Negative	Negative	0	0	0	0	0	0	Negative
Surv_77	1	2013	Yes	0	1	1	0	Positive	Positive	0	0	0	0	0	0	Negative
Control_77	1	2013	Yes	1	0	0	1	Positive	Positive	1	0	0	0	0	0	Negative
Surv_78	1	2010	Yes	0	1	1	0	Positive	Positive	0	0	0	0	0	NA	Unknown
Control_78	1	2013	Yes	1	0	0	1	Positive	Positive	1	0	0	0	0	0	Negative
Surv_79	1	2015	Yes	1	1	1	0	Positive	Positive	1	1	0	1	0	1	Positive
Control_79	1	2014	Yes	1	0	0	1	Positive	Positive	1	1	1	1	1	1	Positive
Surv_80	1	2012	Yes	1	0	0	1	Positive	Positive	1	0	0	0	0	0	Negative
Control_80	1	2012	Yes	0	1	0	0	Positive	Positive	1	0	0	0	0	0	Negative
Surv_81	3.63636	2013	Yes	0	1	1	0	Positive	Negative	0	1	1	1	1	0	Negative
Control_81	1	2012	Yes	1	0	0	1	Positive	Positive	0	1	1	1	1	0	Negative
Surv_82	1	2010	Yes	0	1	0	0	Positive	Positive	1	1	1	1	1	0	Negative
Control_82	1	2010	Yes	1	0	0	1	Positive	Positive	1	1	1	1	1	0	Negative
Surv_83	1	2009	Yes	0	1	1	0	Negative	Negative	0	1	1	1	0	0	Negative
Control_83	1	2009	Yes	0	1	0	0	Positive	Positive	1	0	0	0	0	0	Negative
Surv_84	1	2011	Yes	1	0	0	1	Positive	Positive	1	1	1	1	1	0	Negative
Control_84	1	2010	Yes	1	1	1	1	Positive	Positive	1	1	1	1	1	0	Negative
Surv_85	1	2009	Yes	0	1	1	0	Positive	Positive	0	0	0	0	0	NA	Unknown
Control_85	1	2011	Yes	1	0	0	1	Unknown	Unknown	NA	0	0	0	0	NA	Unknown
Surv_86	1	2008	Yes	NA	1	1	0	Positive	Positive	1	1	1	1	1	0	Negative
Control_86	1	2007	Yes	0	1	1	0	Negative	Negative	0	1	0	1	0	1	Positive
Surv_87	1	2013	Yes	0	1	1	0	Unknown	Unknown	NA	0	0	0	0	NA	Unknown
Control_87	1	2013	Yes	0	1	1	0	Negative	Negative	0	0	0	0	0	0	Negative
Surv_88	1	2005	Yes	1	1	1	1	Negative	Negative	0	1	0	1	0	1	Positive
Control_88	1	2004	Yes	1	0	0	1	Negative	Negative	1	1	1	1	1	1	Negative
Surv_89	1	2014	Yes	1	1	1	1	Positive	Positive	1	1	1	1	1	0	Negative
Control_89	1	2013	NA	1	1	0	0	Negative	Negative	0	0	0	0	0	0	Negative
Surv_90	1	2011	Yes	0	1	1	0	Positive	Positive	1	0	0	0	0	0	Negative
Control_90	1	2011	Yes	0	1	1	0	Positive	Positive	1	0	0	0	0	0	Negative
Surv_91	1	2000	Yes	0	1	1	0	Positive	Positive	1	1	1	0	1	0	Negative
Control_91	1	2000	NA	NA	0	0	0	Unknown	Unknown	NA	0	NA	NA	NA	NA	Unknown
Surv_92	1	2002	NA	0	1	1	0	Positive	Positive	0	0	0	0	0	0	Negative
Control_92	1	2000	Yes	1	0	0	1	Positive	Positive	0	0	0	0	0	NA	Unknown
Surv_93	1	2001	NA	0	1	0	0	Positive	Positive	1	0	0	0	0	0	Negative
Control_93	1	2000	Yes	1	0	0	1	Positive	Positive	1	1	1	1	1	0	Negative
Surv_94	1	2002	Yes	1	1	0	1	Positive	Positive	1	1	1	0	1	0	Negative
Control_94	1	2003	NA	NA	0	0	0	Unknown	Unknown	NA	0	NA	NA	NA	NA	Unknown
Surv_95	1	2014	Yes	0	1	1	0	Positive	Negative	0	0	0	0	0	0	Negative
Control_95	1	2014	Yes	0	1	1	0	Positive	Negative	1	1	1	1	0	0	Negative
Surv_96	1	2004	NA	NA	1	0	0	Positive	Positive	1	0	NA	NA	NA	0	Negative
Control_96	1	2003	Yes	1	1	0	0	Positive	Positive	1	1	1	1	1	0	Negative
Surv_97	1	2005	Yes	0	1	1	0	Positive	Positive	0	0	0	0	0	NA	Unknown
Control_97	1	2006	Yes	0	1	0	0	Positive	Negative	0	0	0	0	0	NA	Unknown
Surv_98	1	1995	Yes	0	1	1	0	Unknown	Unknown	NA	1	1	1	0	NA	Unknown
Control_98	1	1993	NA	1	0	0	1	Unknown	Unknown	NA	0	0	0	0	NA	Unknown
Surv_99	1	2009	Yes	1	1	1	1	Positive	Positive	1	1	1	1	0	0	Negative
Control_99	1	2009	Yes	1	0	0	1	Positive	Positive	1	1	1	1	1	0	Negative
Surv_100	1	2007	Yes	1	1	1	1	Positive	Negative	0	0	0	0	0	NA	Unknown
Control_100	1	2008	Yes	0	0	0	1	Positive	Positive	0	0	0	0	0	0	Negative
Surv_101	1	2001	Yes	1	1	1	1	Negative	Negative	0	1	1	1	0	0	Negative
Control_101	1	2002	NA	1	0	0	1	Negative	Negative	0	0	0	0	0	0	Negative
Surv_102	1	2002	Yes	1	1	1	0	Negative	Negative	0	1	1	1	1	0	Positive
Control_102	1	2001	Yes	1	0	0	1	Negative	Negative	0	1	1	1	1	1	Positive
Surv_103	1	2007	Yes	0	1	1	0	Positive	Positive	1	1	1	1	1	0	Negative
Control_103	1	2007	Yes	0	1	1	0	Positive	Positive	1	1	1	1	0	0	Negative
Surv_104	1	2012	Yes	0	1	0	0	Positive	Positive	0	0	0	0	0	NA	Unknown
Control_104	1	2012	Yes	0	1	1	0	Positive	Positive	0	0	0	0	0	NA	Unknown
Surv_105	1	1993	NA	NA	0	0	0	Negative	Negative	0	0	NA	NA	NA	NA	Unknown
Control_105	1	2011	Yes	0	1	1	0	Positive	Negative	1	1	1	0	1	0	Negative
Surv_106	1	1999	Yes	NA	1	1	0	Positive	Positive	1	0	0	0	0	0	Positive
Control_106	1	1999	Yes	1	0	0	1	Positive	Positive	1	0	0	0	0	0	Positive
Surv_107	1	2002	Yes	0	1	0	0	Positive	Positive	1	1	1	0	1	0	Negative
Control_107	1	2001	Yes	1	0	0	1	Positive	Positive	1	1	1	1	1	0	Negative
Surv_108	1	2010	Yes	0	1	1	0	Positive	Positive	1	0	0	0	0	0	Negative
Control_108	1	2009	Yes	1	1	0	0	Positive	Positive	1	0	0	0	0	0	Negative
Surv_109	1	2004	Yes	0	1	1	0	Positive	Positive	1	1	1	0	1	NA	Unknown
Control_109	1	2003	Yes	1	0	0	1	Positive	Positive	1	0	0	0	0	NA	Unknown
Surv_110	1	2013	NA	0	1	1	1	Unknown	Unknown	NA	0	NA	NA	NA	NA	Unknown
Control_110	1	2015	Yes	0	0	0	1	Unknown	Unknown	NA	0	0	0	0	NA	Unknown
Surv_111	1	1993	Yes	NA	1	1	0	Unknown	Unknown	NA	1	1	0	1	NA	Unknown
Control_111	1	1992	No	1	0	0	1	Positive	Positive	1	0	0	0	0	NA	Unknown
Surv_112	1	1999	Yes	0	1	1	0	Positive	Positive	0	0	0	0	0	NA	Unknown
Control_112	1	1999	Yes	0	1	0	0	Unknown	Unknown	1	0	0	0	0	NA	Unknown
Surv_113	1	2008	Yes	0	1	1	0	Positive	Positive	0	0	0	0	0	0	Negative
Control_113	1	2007	Yes	1	0	0	1	Positive	Positive	1	0	0	0	0	0	Negative
Surv_114	1	1999	Yes	0	1	1	1	Positive	Positive	1	1	1	1	1	0	Negative
Control_114	1	1999	NA	NA	0	0	1	Positive	Positive	0	0	0	0	0	0	Negative
Surv_115	1	2010	Yes	1	1	0	0	Positive	Positive	1	1	1	1	1	0	Negative
Control_115	1	2011	Yes	1	1	0	0	Positive	Positive	1	1	1	1	1	0	Negative
Surv_116	1	2007	Yes	1	1	1	1	Positive	Positive	0	0	0	0	0	0	Negative
Control_116	1	2006	Yes	0	0	0	1	Unknown	NA	NA	0	0	0	0	NA	Unknown
Surv_117	1	2001	Yes	0	1	1	0	Unknown	Unknown	1	0	0	0	0	NA	Unknown
Control_117	1	2002	Yes	1	0	0	1	Unknown	Unknown	1	0	0	0	0	NA	Unknown
Surv_118	1	2010	Yes	1	0	0	1	Positive	Positive	0	0	0	0	0	NA	Unknown
Control_118	1	2010	Yes	1	0	0	1	Positive	Positive	1	0	0	0	0	0	Negative
Surv_119	1	2004	Yes	0	1	0	1	Positive	Positive	1	0	0	0	0	0	Negative
Control_119	1	2004	Yes	1	0	0	1	Positive	Positive	1	1	1	0	1	0	Negative
Surv_120	1	2001	Yes	0	1	1	0	Positive	Positive	1	1	1	0	0	NA	Unknown
Control_120	1	2000	NA	NA	1	0	0	Positive	Negative	0	0	NA	NA	NA	0	Positive
Surv_121	1	2011	Yes	0	1	1	0	Negative	Negative	0	1	1	1	0	0	Negative
Control_121	1	2011	Yes	1	1	0	0	Negative	Negative	0	1	0	1	0	1	Positive
Surv_122	1	2008	Yes	1	1	0	0	Positive	Positive	1	1	1	1	0	0	Negative
Control_122	1	2010	NA	NA	0	0	0	Unknown	Unknown	NA	0	NA	NA	NA	NA	Unknown
Surv_123	1	2012	Yes	0	0	0	1	Positive	Positive	1	0	0	0	0	0	Negative
Control_123	1	2012	Yes	1	1	0	1	Positive	Positive	1	0	0	0	0	0	Negative
Surv_124	1	2008	Yes	0	1	1	0	Positive	Positive	1	1	1	0	1	0	Negative
Control_124	1	2008	Yes	0	1	1	0	Negative	Negative	0	1	1	0	1	0	Negative
Surv_125	1	1991	Yes	0	1	1	0	Positive	Positive	0	1	1	0	0	NA	Unknown
Control_125	1	1993	NA	0	1	0	0	Unknown	Unknown	NA	0	0	0	0	NA	Unknown
Surv_126	1	2009	Yes	1	0	0	1	Negative	Negative	0	1	0	1	0	1	Positive
Control_126	1	2013	Yes	0	1	1	0	Negative	Negative	0	1	1	1	1	1	Positive
Surv_127	1	2013	Yes	1	0	0	1	Positive	Positive	1	0	0	0	0	0	Negative
Control_127	1	2013	Yes	1	1	1	0	Positive	Positive	1	1	1	1	1	0	Negative
Surv_128	1	2000	Yes	0	1	1	1	Negative	Negative	0	1	1	1	1	0	Negative
Control_128	1	2001	Yes	1	0	0	1	Negative	Negative	0	1	1	0	1	0	Negative
Surv_129	1	2005	Yes	0	1	1	0	Positive	Negative	1	1	1	1	1	1	Positive
Control_129	1	2005	Yes	1	0	0	1	Positive	Negative	1	1	1	1	1	1	Positive
Surv_130	1	2000	Yes	0	1	1	1	Positive	Positive	1	1	1	0	1	NA	Unknown
Control_130	1	2001	Yes	0	1	0	0	Positive	Positive	1	0	0	0	0	0	Positive
Surv_131	1	2003	Yes	0	1	1	0	Positive	Positive	1	1	1	0	1	NA	Unknown
Control_131	1	2004	Yes	1	0	0	1	Positive	Positive	1	0	0	0	0	0	Negative
Surv_132	1	2007	No	0	1	0	0	Negative	Negative	0	0	0	0	0	0	Positive
Control_132	1	2008	Yes	1	1	1	1	Negative	Negative	1	1	1	1	1	1	Positive
Surv_133	1	2005	No	1	0	0	1	Negative	Negative	0	0	0	0	0	0	Negative
Control_133	1	2005	Yes	0	1	0	0	Positive	Positive	1	0	0	0	0	0	Negative
Surv_134	1	2016	Yes	1	0	0	0	Positive	Negative	1	1	0	0	0	0	Negative
Control_134	1	2016	NA	1	0	0	1	Positive	Positive	1	0	0	0	0	0	Negative
Surv_135	1	1997	Yes	0	1	0	0	Positive	Positive	1	1	1	0	1	NA	Unknown
Control_135	1	1996	NA	NA	0	0	0	Unknown	NA	NA	0	NA	NA	NA	NA	Unknown
Surv_136	1	2013	Yes	0	1	0	0	Positive	Positive	0	0	0	0	0	0	Negative
Control_136	1	2013	Yes	0	1	0	0	Positive	Positive	0	0	0	0	0	NA	Unknown
Surv_137	1	1995	Yes	0	1	0	0	Negative	Negative	0	1	1	0	0	NA	Unknown
Control_137	1	1995	Yes	1	0	0	0	Positive	Unknown	1	1	1	0	1	0	Negative
Surv_138	1	2011	Yes	1	1	1	1	Positive	Positive	1	0	0	0	0	0	Negative
Control_138	1	2012	Yes	0	1	1	0	Positive	Positive	0	0	0	0	0	0	Negative
Surv_139	1	2013	Yes	1	1	1	0	Positive	Positive	1	1	1	1	0	0	Negative
Control_139	1	2013	Yes	1	1	1	0	Positive	Positive	1	1	1	1	1	0	Negative
Surv_140	1	2014	Yes	0	1	1	0	Positive	Positive	1	0	0	0	0	0	Negative
Control_140	1	2013	Yes	1	0	0	1	Positive	Positive	1	1	1	1	0	0	Negative
Surv_141	1	2001	NA	NA	0	0	0	Unknown	NA	NA	0	NA	NA	NA	NA	Unknown
Control_141	1	2000	Yes	0	1	1	0	Unknown	Unknown	NA	0	0	0	0	NA	Unknown
Surv_142	1	2010	Yes	0	1	1	0	Positive	Negative	0	0	0	0	0	1	Positive
Control_142	1	2010	Yes	0	1	1	0	Negative	Negative	1	1	1	1	1	1	Positive
Surv_143	1	2005	Yes	1	0	0	1	Negative	Negative	0	1	1	1	1	0	Negative
Control_143	1	2006	Yes	1	1	1	0	Negative	Negative	0	1	1	1	1	0	Negative
Surv_144	1	2008	Yes	0	1	1	1	Positive	Positive	0	0	0	0	0	NA	Unknown
Control_144	1	2009	Yes	0	1	0	0	Positive	Negative	1	0	0	0	0	0	Negative
Surv_145	1	2013	Yes	0	1	1	0	Positive	Positive	1	0	0	0	0	0	Negative
Control_145	1	2013	Yes	0	1	0	0	Negative	Negative	0	0	0	0	0	0	Negative
Surv_146	1	2004	Yes	0	1	1	0	Positive	Negative	0	0	0	0	0	NA	Unknown
Control_146	1	2004	Yes	1	0	0	1	Positive	Positive	1	0	0	0	0	0	Negative
Surv_147	1	2011	Yes	0	1	1	0	Negative	Negative	0	1	0	1	0	1	Positive
Control_147	1	2010	Yes	1	0	0	1	Positive	Positive	1	0	0	0	0	0	Negative
Surv_148	1	1996	Yes	0	1	1	0	Unknown	Unknown	NA	0	0	0	0	NA	Unknown
Control_148	1	1996	Yes	0	0	0	1	Positive	Positive	0	1	1	0	1	NA	Unknown
Surv_149	1	1999	Yes	1	1	1	1	Negative	Negative	0	1	0	1	0	1	Positive
Control_149	1	2000	NA	NA	0	0	0	Unknown	Unknown	NA	0	NA	NA	NA	NA	Unknown
Surv_150	1	2011	Yes	1	0	0	1	Positive	Positive	1	0	0	0	0	0	Negative
Control_150	1	2010	Yes	0	0	0	0	Unknown	Unknown	NA	0	0	0	0	NA	Unknown
Surv_151	1	2010	Yes	0	1	1	0	Positive	Positive	1	0	0	0	0	0	Negative
Control_151	1	2013	Yes	0	1	1	0	Positive	Positive	0	0	0	0	0	0	Negative
Surv_152	1	2015	Yes	0	0	0	1	Positive	Positive	1	0	0	0	0	0	Negative
Control_152	1	2016	Yes	1	0	0	1	Positive	Positive	0	0	0	0	0	NA	Unknown
Surv_153	1	2011	Yes	0	1	1	0	Positive	Positive	0	0	0	0	0	NA	Unknown
Control_153	1	2012	Yes	0	0	0	1	Positive	Positive	1	0	0	0	0	NA	Unknown
Surv_154	1	2010	Yes	0	1	0	0	Positive	Positive	1	0	0	0	0	NA	Unknown
Control_154	1	2009	Yes	0	1	0	1	Positive	Positive	0	0	0	0	0	NA	Unknown
Surv_155	1	2003	NA	0	1	1	0	Positive	Positive	1	0	0	0	0	0	Negative
Control_155	1	2003	Yes	0	1	0	0	Positive	Positive	1	1	1	0	1	0	Negative
Surv_156	1	1999	Yes	0	1	1	0	Unknown	Unknown	NA	0	0	0	0	NA	Unknown
Control_156	1	1999	Yes	NA	1	0	0	Unknown	Unknown	NA	0	0	0	0	NA	Unknown
Surv_157	1	1995	No	0	1	0	0	Positive	Positive	1	1	0	0	0	NA	Unknown
Control_157	1	1995	NA	NA	0	0	0	Unknown	Unknown	NA	0	NA	NA	NA	NA	Unknown
Surv_158	1	1999	Yes	0	1	1	0	Unknown	Unknown	NA	0	0	0	0	NA	Unknown
Control_158	1	2003	Yes	1	0	0	1	Unknown	Unknown	1	0	0	0	0	NA	Unknown
Surv_159	1	2007	Yes	1	0	0	1	Positive	Negative	1	1	0	1	0	1	Positive
Control_159	1	2008	Yes	1	1	0	0	Positive	Negative	1	1	0	1	0	1	Positive
Surv_160	1	2008	Yes	1	0	0	1	Positive	Positive	1	1	1	1	0	0	Negative
Control_160	1	2008	Yes	0	1	0	1	Positive	Positive	1	0	0	0	0	0	Negative
Surv_162	1	2016	Yes	0	0	0	1	Positive	Positive	1	0	0	0	0	NA	Unknown
Control_162	1	2016	Yes	1	0	0	1	Positive	Positive	1	0	0	0	0	NA	Unknown
Surv_164	1	2002	Yes	0	1	1	0	Negative	Negative	0	1	1	1	1	0	Positive
Control_164	1	2001	Yes	0	1	0	0	Negative	Negative	0	0	0	0	0	0	Positive
Surv_165	1	2002	NA	NA	1	0	0	Unknown	Unknown	NA	0	NA	NA	NA	NA	Unknown
Control_165	1	2002	NA	1	1	0	0	Unknown	NA	NA	0	0	0	0	0	Positive
Surv_166	1	2006	Yes	1	0	0	1	Negative	Negative	0	1	0	1	0	1	Positive
Control_166	1	2006	Yes	NA	1	1	1	Negative	Negative	0	0	0	0	0	1	Positive
Surv_167	1	2010	Yes	1	1	1	1	Positive	Positive	1	1	1	1	0	1	Negative
Control_167	1	2010	Yes	0	1	1	0	Positive	Negative	1	0	0	0	0	0	Negative
Surv_168	1	2011	Yes	0	1	1	0	Positive	Positive	1	0	0	0	0	0	Negative
Control_168	1	2011	Yes	0	1	1	0	Positive	Positive	1	0	0	0	0	0	Negative
Surv_169	1	2002	Yes	0	1	1	0	Positive	Positive	1	0	0	0	0	NA	Unknown
Control_169	1	2010	Yes	1	0	0	1	Positive	Positive	0	0	NA	NA	NA	NA	Unknown
Surv_170	1	2008	Yes	0	1	1	1	Positive	Positive	0	0	0	0	0	NA	Unknown
Control_170	1	2009	Yes	1	0	0	1	Positive	Positive	0	0	0	0	0	0	Negative
Surv_171	1	2011	Yes	0	1	0	0	Positive	Positive	0	0	0	0	0	0	Negative
Control_171	1	2011	Yes	0	1	0	0	Positive	Positive	1	0	0	0	0	0	Negative
Surv_172	1	2007	Yes	0	1	1	0	Positive	Unknown	0	0	0	0	0	NA	Unknown
Control_172	1	2007	Yes	NA	1	0	0	Positive	Positive	1	0	0	0	0	0	Negative
Surv_173	1	2014	Yes	1	1	0	0	Positive	Positive	1	1	1	1	1	0	Negative
Control_173	1	2014	Yes	1	1	1	0	Positive	Positive	1	1	1	1	1	0	Negative
Surv_174	1	2009	Yes	NA	1	1	0	Positive	Positive	1	1	0	1	0	1	Positive
Control_174	1	2010	Yes	1	1	0	1	Positive	Positive	1	1	0	1	0	1	Positive
Surv_175	1	2001	Yes	1	0	0	1	Positive	Unknown	1	1	1	0	1	1	Positive
Control_175	1	2001	Yes	1	0	0	1	Positive	Positive	1	1	1	0	1	0	Negative
Surv_176	1	2009	Yes	0	1	1	1	Positive	Positive	0	0	0	0	0	0	Negative
Control_176	1	2009	Yes	0	1	0	0	Positive	Positive	1	1	1	1	0	0	Negative
Surv_177	1	2016	Yes	1	1	0	0	Positive	Negative	1	1	1	1	1	1	Positive
Control_177	1	2016	Yes	1	1	1	0	Positive	Negative	1	1	1	1	1	1	Positive
Surv_178	1	2006	Yes	0	1	1	0	Positive	Positive	0	1	1	0	1	0	Negative
Control_178	1	2005	Yes	0	1	0	1	Positive	Positive	1	1	1	0	1	0	Negative
Surv_179	1	2013	Yes	0	1	1	0	Positive	Positive	1	1	0	1	0	1	Positive
Control_179	1	2014	Yes	1	1	1	0	Positive	Negative	1	1	0	1	0	1	Positive
Surv_180	1	2011	Yes	0	1	1	0	Negative	Negative	0	1	0	1	0	1	Positive
Control_180	1	2010	Yes	1	0	0	1	Negative	Negative	0	1	1	1	1	1	Positive
Surv_181	1	1999	Yes	0	1	1	1	Positive	Unknown	1	1	1	0	1	0	Negative
Control_181	1	1999	Yes	1	0	0	1	Positive	Positive	1	0	0	0	0	0	Negative
Surv_182	1	2012	Yes	0	1	1	0	Positive	Positive	1	0	0	0	0	0	Negative
Control_182	1	2012	Yes	1	0	0	1	Positive	Positive	1	0	0	0	0	0	Negative
Surv_183	1	1986	Yes	0	1	1	0	Negative	Unknown	0	0	0	0	0	NA	Unknown
Control_183	1	2015	Yes	0	1	1	0	Positive	Positive	0	1	1	0	1	0	Negative
Surv_184	1	2007	Yes	0	1	1	0	Unknown	Unknown	NA	0	0	0	0	NA	Unknown
Control_184	1	2007	Yes	1	0	0	1	Unknown	Unknown	1	0	0	0	0	NA	Unknown
Surv_186	1	2013	Yes	0	1	1	0	Negative	Negative	0	1	1	1	0	0	Negative
Control_186	1	2014	No	1	1	1	0	Negative	Negative	0	1	1	1	1	0	Negative
Surv_187	1	2006	Yes	0	1	1	0	Positive	Positive	1	0	0	0	0	0	Negative
Control_187	1	2006	Yes	1	0	0	1	Positive	Positive	1	0	0	0	0	0	Negative
Surv_188	1	1998	Yes	0	1	1	1	Positive	Positive	0	0	0	0	0	0	Negative
Control_188	1	1998	No	1	0	0	0	Positive	Positive	1	1	0	0	1	0	Negative
Surv_189	1	2002	Yes	0	0	0	1	Unknown	Unknown	NA	0	0	0	0	NA	Unknown
Control_189	1	2003	Yes	0	1	0	0	Unknown	Unknown	NA	0	0	0	0	NA	Unknown
Surv_190	1	2006	Yes	1	0	0	1	Negative	Negative	0	1	0	1	0	0	Negative
Control_190	1	2006	Yes	1	0	0	1	Negative	Negative	0	1	1	1	1	0	Negative
Surv_191	1	2012	No	0	1	1	0	Positive	Positive	1	0	0	0	0	0	Negative
Control_191	1	2012	Yes	1	1	1	0	Negative	Negative	0	1	1	1	1	1	Positive
Surv_192	1	2011	Yes	0	1	1	0	Positive	Positive	1	1	1	1	1	0	Negative
Control_192	1	2011	Yes	1	1	0	0	Positive	Positive	1	1	1	1	1	0	Negative
Surv_193	1	2009	Yes	0	1	1	0	Positive	Positive	1	0	0	0	0	0	Negative
Control_193	1	2009	Yes	1	0	0	1	Positive	Positive	1	0	0	0	0	0	Negative
Surv_194	1	2012	Yes	1	0	0	0	Negative	Negative	0	1	1	1	1	0	Negative
Control_194	1	2011	NA	NA	1	0	0	Negative	Negative	0	0	NA	NA	NA	0	Negative
Surv_195	1	2011	Yes	0	1	1	0	Positive	Positive	0	0	0	0	0	0	Negative
Control_195	1	2011	Yes	1	0	0	1	Positive	Positive	1	0	0	0	0	NA	Unknown
Surv_196	1	1994	Yes	0	0	0	1	Unknown	Unknown	NA	0	0	0	0	NA	Unknown
Control_196	1	2016	Yes	0	1	1	0	Positive	Positive	0	0	0	0	0	0	Negative
Surv_198	1	2012	Yes	1	1	1	0	Positive	Positive	1	1	1	1	1	0	Negative
Control_198	1	2012	Yes	0	1	1	0	Positive	Negative	0	1	0	1	0	1	Positive
Surv_199	1	2013	Yes	1	0	0	0	Positive	Positive	1	1	0	1	0	1	Positive
Control_199	1	2013	Yes	0	1	1	0	Positive	Positive	1	1	0	0	0	0	Negative
Surv_200	1	2012	Yes	1	0	0	1	Positive	Positive	1	0	0	0	0	1	Positive
Control_200	1	2012	No	0	1	0	0	Positive	Negative	1	1	0	1	0	0	Positive
Surv_201	1	2015	Yes	0	1	1	0	Positive	Positive	1	0	0	0	0	0	Negative
Control_201	1	2016	Yes	0	1	1	0	Positive	Positive	1	0	0	0	0	0	Negative
Surv_202	1	2012	Yes	0	1	1	0	Positive	Positive	0	0	0	0	0	NA	Unknown
Control_202	1	2012	Yes	0	1	1	0	Positive	Negative	0	0	0	0	0	0	Negative
Surv_203	1	2014	Yes	0	1	0	0	Positive	Positive	1	1	0	1	0	1	Positive
Control_203	1	2014	NA	NA	0	0	1	Positive	Positive	0	0	0	0	0	0	Positive
Surv_204	1	2000	Yes	0	1	1	0	Positive	Positive	1	1	1	1	1	0	Negative
Control_204	1	2001	Yes	0	1	0	0	Positive	Positive	1	0	0	0	0	0	Negative
Surv_205	1	2008	Yes	0	0	0	0	Positive	Positive	0	1	0	1	0	1	Negative
Control_205	1	2009	No	1	0	0	1	Positive	Positive	1	1	1	1	0	0	Negative
Surv_206	1	2000	Yes	0	1	0	1	Unknown	Unknown	NA	0	0	0	0	NA	Unknown
Control_206	1	2001	Yes	0	1	1	0	Unknown	Unknown	NA	0	0	0	0	NA	Unknown
Surv_207	1	2001	Yes	0	1	1	0	Negative	Negative	1	1	1	1	0	1	Negative
Control_207	1	2001	NA	NA	0	0	0	Unknown	Unknown	NA	0	NA	NA	NA	NA	Unknown
Surv_208	1	2005	Yes	1	0	0	1	Unknown	Unknown	1	0	0	0	0	NA	Unknown
Control_208	1	2005	Yes	0	1	0	1	Positive	Positive	0	0	0	0	0	NA	Unknown
Surv_209	1	2012	Yes	0	1	1	1	Positive	Positive	1	0	0	0	0	0	Negative
Control_209	1	2012	Yes	1	0	0	1	Positive	Positive	1	1	1	1	0	0	Negative
Surv_210	1	2011	Yes	1	1	0	0	Positive	Positive	1	1	0	1	0	1	Positive
Control_210	1	2011	Yes	1	1	0	0	Positive	Positive	1	1	1	1	1	1	Positive
Surv_212	1	2011	Yes	0	1	1	0	Unknown	Unknown	1	0	0	0	0	NA	Unknown
Control_212	1	2013	Yes	1	1	1	0	Positive	Positive	1	1	NA	1	NA	1	Positive
Surv_213	1	1993	Yes	NA	1	1	0	Unknown	Unknown	NA	1	1	0	1	NA	Unknown
Control_213	1	1995	Yes	1	0	0	1	Positive	Positive	1	1	1	0	1	NA	Unknown
Surv_214	1	1999	Yes	0	1	0	0	Positive	Positive	1	1	1	0	1	NA	Unknown
Control_214	1	1999	NA	0	1	0	1	Negative	Negative	0	0	NA	NA	NA	0	Negative
Surv_215	1	2002	Yes	0	1	0	1	Positive	Unknown	1	0	0	0	0	NA	Unknown
Control_215	1	2001	NA	NA	0	0	0	Unknown	Unknown	NA	0	NA	NA	NA	NA	Unknown
Surv_216	1	2012	Yes	0	1	1	0	Positive	Positive	1	0	0	0	0	0	Negative
Control_216	1	2013	Yes	1	0	0	1	Positive	Negative	1	0	0	0	0	0	Negative
Surv_217	1	1994	NA	0	1	0	0	Unknown	Unknown	NA	0	NA	NA	NA	NA	Unknown
Control_217	1	1993	Yes	0	1	0	0	Unknown	Unknown	1	1	1	0	1	NA	Unknown
Surv_220	1	1999	Yes	0	1	0	0	Positive	Positive	1	0	0	0	0	0	Negative
Control_220	1	1999	NA	NA	0	0	0	Unknown	Unknown	NA	0	NA	NA	NA	NA	Unknown
Surv_221	1	2014	Yes	0	1	1	0	Positive	Positive	0	0	0	0	0	0	Negative
Control_221	1	2014	Yes	0	1	1	0	Negative	Negative	0	0	0	0	0	NA	Unknown
Surv_222	1	2008	Yes	1	1	1	0	Positive	Positive	1	1	1	1	0	0	Negative
Control_222	1	2009	Yes	0	1	1	0	Positive	Positive	1	1	1	1	1	0	Negative
Surv_223	1	2008	Yes	1	0	0	1	Positive	Positive	1	0	0	0	0	NA	Unknown
Control_223	1	2009	NA	NA	0	0	0	Unknown	Unknown	NA	0	NA	NA	NA	NA	Unknown
Surv_224	1	2012	Yes	0	1	1	0	Positive	Positive	0	0	0	0	0	NA	Unknown
Control_224	1	2012	Yes	1	0	0	1	Positive	Positive	0	0	0	0	0	NA	Unknown
Surv_225	1	2005	Yes	0	1	0	0	Positive	Positive	1	1	1	1	1	0	Negative
Control_225	1	2010	Yes	1	0	0	0	Negative	Negative	0	1	1	1	1	1	Positive
Surv_226	1	2006	Yes	0	1	1	0	Positive	Positive	0	0	0	0	0	0	Positive
Control_226	1	2008	Yes	0	1	0	0	Positive	Positive	0	0	0	0	0	0	Negative
Surv_227	1	2016	Yes	1	1	1	0	Positive	Negative	1	1	1	1	0	0	Negative
Control_227	1	2015	Yes	1	0	0	1	Negative	Negative	0	1	1	1	1	0	Negative
Surv_229	1	2004	Yes	0	1	1	0	Positive	Positive	1	1	1	1	1	1	Positive
Control_229	1	2004	Yes	1	0	0	1	Negative	Negative	1	1	1	1	1	0	Negative
Surv_230	1	1995	Yes	0	1	1	0	Positive	Positive	0	0	0	0	0	NA	Unknown
Control_230	1	1995	NA	NA	0	0	0	Unknown	Unknown	NA	0	NA	NA	NA	NA	Unknown
Surv_231	1	2009	Yes	0	1	0	0	Positive	Positive	0	1	1	1	1	0	Negative
Control_231	1	2008	NA	1	1	0	0	Positive	Positive	0	0	0	0	0	0	Negative
Surv_232	1	2001	No	0	0	0	1	Positive	Negative	1	1	0	1	0	0	Negative
Control_232	1	2001	No	1	1	1	0	Positive	Unknown	1	1	1	0	1	0	Negative
Surv_233	1	2009	Yes	0	1	1	0	Positive	Negative	0	1	1	1	0	0	Negative
Control_233	1	2010	Yes	1	0	0	1	Positive	Positive	1	0	0	0	0	0	Negative
Surv_234	1	1998	Yes	0	1	1	0	Positive	Positive	1	1	1	0	0	NA	Unknown
Control_234	1	1998	No	1	1	0	0	Positive	Positive	1	1	0	0	1	NA	Unknown
Surv_235	1	2013	No	0	0	0	0	Positive	Positive	1	0	0	0	0	0	Negative
Control_235	1	2013	Yes	0	1	1	0	Positive	Positive	1	0	0	0	0	0	Negative
Surv_236	1	2013	Yes	0	1	1	0	Positive	Positive	1	1	1	1	0	0	Negative
Control_236	1	2013	Yes	1	1	0	0	Positive	Positive	1	1	1	1	0	0	Negative
Surv_238	1	2002	Yes	0	1	0	0	Positive	Positive	1	0	0	0	0	0	Negative
Control_238	1	2003	NA	NA	0	0	0	Positive	Positive	0	0	NA	NA	NA	0	Negative
Surv_239	1	2001	Yes	0	1	1	0	Unknown	Unknown	NA	0	0	0	0	NA	Unknown
Control_239	1	2000	NA	NA	0	0	0	Unknown	Unknown	NA	0	NA	NA	NA	NA	Unknown
Surv_240	1	2004	No	1	0	0	1	Positive	Positive	1	1	0	1	0	0	Negative
Control_240	1	2003	Yes	0	1	0	0	Positive	Positive	1	1	1	0	1	0	Negative
Surv_241	1	2008	Yes	1	1	1	0	Negative	Negative	0	1	0	1	0	1	Positive
Control_241	1	2008	Yes	1	1	0	0	Negative	Negative	0	1	0	1	0	1	Positive
Surv_242	1	2013	Yes	0	1	1	0	Negative	Negative	0	1	0	1	0	0	Negative
Control_242	1	2013	Yes	1	1	1	0	Negative	Negative	0	1	1	1	1	0	Negative
Surv_245	1	2000	No	0	1	1	0	Positive	Positive	0	0	0	0	0	0	Negative
Control_245	1	2000	NA	NA	0	0	0	Unknown	Unknown	NA	0	NA	NA	NA	NA	Unknown
Surv_246	1	2000	Yes	0	1	1	0	Positive	Positive	1	1	1	1	0	0	Positive
Control_246	1	2001	Yes	0	1	0	0	Positive	Positive	1	1	1	0	1	0	Negative
Surv_248	1	1994	Yes	0	1	1	0	Positive	Positive	1	0	0	0	0	0	Negative
Control_248	1	1995	NA	NA	0	0	0	Unknown	Unknown	NA	0	NA	NA	NA	NA	Unknown
Surv_249	1	2001	Yes	0	1	1	0	Positive	Negative	1	1	1	0	1	0	Positive
Control_249	1	2001	NA	NA	0	0	0	Unknown	Unknown	NA	0	NA	NA	NA	NA	Unknown
Surv_250	1	2014	Yes	0	1	1	0	Positive	Positive	1	0	0	0	0	0	Negative
Control_250	1	2015	Yes	1	0	0	1	Positive	Positive	1	0	0	0	0	0	Negative
Surv_251	1	2012	Yes	0	0	0	1	Positive	Negative	1	0	0	0	0	0	Negative
Control_251	1	2012	Yes	1	1	1	0	Positive	Positive	1	0	0	0	0	0	Negative
Surv_252	1	2001	Yes	0	1	1	0	Positive	Negative	1	1	1	1	1	0	Positive
Control_252	1	2002	Yes	1	1	0	0	Positive	Positive	1	1	1	0	1	0	Negative
Surv_253	1	2001	Yes	0	1	1	0	Unknown	Unknown	1	0	0	0	0	NA	Unknown
Control_253	1	2002	Yes	0	1	0	0	Unknown	Unknown	1	0	0	0	0	NA	Unknown
Surv_254	1	1988	NA	NA	1	0	0	Unknown	Unknown	NA	0	0	0	0	NA	Unknown
Control_254	1	1993	NA	1	1	0	0	Unknown	Unknown	NA	0	0	0	0	NA	Unknown
Surv_255	1	1997	Yes	0	0	0	1	Unknown	Unknown	NA	0	0	0	0	NA	Unknown
Control_255	1	1997	Yes	1	0	0	1	Unknown	Unknown	NA	0	0	0	0	NA	Unknown
Surv_256	1	1994	Yes	0	0	0	1	Unknown	Unknown	NA	0	0	0	0	NA	Unknown
Control_256	1	2012	Yes	0	1	1	0	Positive	Positive	0	0	0	0	0	NA	Unknown
Surv_257	1	2000	Yes	0	1	1	0	Unknown	Unknown	NA	0	0	0	0	NA	Unknown
Control_257	1	2000	Yes	1	0	0	1	Negative	Negative	1	0	0	0	0	0	Negative
Surv_258	1	2002	Yes	0	1	1	0	Positive	Negative	1	1	1	0	1	0	Positive
Control_258	1	2006	Yes	1	0	0	1	Positive	Positive	1	1	1	0	1	0	Negative
Surv_259	1	2000	Yes	0	1	0	0	Positive	Positive	1	1	1	1	1	0	Negative
Control_259	1	2000	Yes	1	0	0	1	Negative	Negative	0	1	1	1	1	0	Negative
Surv_260	1	2004	NA	NA	0	0	1	Negative	Negative	0	1	1	0	0	NA	Unknown
Control_260	1	2004	Yes	1	0	0	1	Positive	Positive	1	1	1	0	1	0	Negative
Surv_261	1	2013	No	0	1	1	0	Positive	Positive	0	0	0	0	0	0	Negative
Control_261	1	2013	Yes	1	1	0	0	Positive	Positive	1	1	1	1	0	0	Negative
Surv_262	1	1995	Yes	0	1	0	0	Positive	Positive	1	1	1	0	0	NA	Unknown
Control_262	1	1994	NA	NA	0	0	1	Unknown	Unknown	NA	0	NA	NA	NA	NA	Unknown
Surv_263	1	2010	Yes	0	1	1	0	Positive	Positive	1	1	1	1	0	0	Negative
Control_263	1	2013	Yes	0	1	1	0	Positive	Positive	1	1	1	1	1	1	Positive
Surv_264	1	2015	Yes	1	0	0	1	Positive	Positive	1	1	0	1	0	1	Positive
Control_264	1	2015	Yes	1	1	0	0	Positive	Positive	1	1	0	1	0	1	Positive
Surv_265	1	2006	Yes	0	1	1	0	Unknown	Unknown	NA	0	0	0	0	NA	Unknown
Control_265	1	2008	Yes	0	1	1	0	Negative	Negative	0	0	0	0	0	0	Negative
Surv_266	1	2000	Yes	0	1	1	0	Positive	Positive	1	1	1	0	1	0	Positive
Control_266	1	1999	NA	1	0	0	1	Unknown	Unknown	NA	0	NA	NA	NA	NA	Unknown
Surv_267	1	1999	Yes	0	1	1	0	Unknown	Unknown	NA	0	0	0	0	NA	Unknown
Control_267	1	2001	Yes	0	1	0	0	Unknown	Unknown	NA	0	0	0	0	NA	Unknown
Surv_268	1	2003	Yes	0	1	1	0	Negative	Negative	0	1	1	1	1	0	Negative
Control_268	1	2004	Yes	1	0	0	1	Negative	Negative	0	1	1	1	1	0	Negative
Surv_269	1	2012	Yes	0	1	1	0	Negative	Negative	0	1	1	1	1	0	Negative
Control_269	1	2012	Yes	0	1	1	1	Negative	Negative	0	1	1	1	1	0	Negative
Surv_270	1	2000	Yes	0	1	1	0	Negative	Negative	0	1	1	1	1	1	Unknown
Control_270	1	2000	Yes	1	0	0	1	Unknown	Unknown	NA	0	0	0	0	NA	Unknown
Surv_271	1	2002	Yes	0	1	0	0	Positive	Unknown	1	0	0	0	0	NA	Unknown
Control_271	1	1998	Yes	NA	0	0	0	Unknown	Unknown	NA	0	0	0	0	NA	Unknown
Surv_272	1	2005	Yes	0	1	1	0	Positive	Unknown	1	0	0	0	0	NA	Unknown
Control_272	1	2004	Yes	1	0	0	1	Positive	Positive	1	0	0	0	0	0	Negative
Surv_273	1	2005	Yes	0	1	1	0	Positive	Unknown	0	0	0	0	0	NA	Unknown
Control_273	1	2005	Yes	0	1	1	0	Negative	Negative	0	0	0	0	0	0	Negative
Surv_274	1	2010	Yes	0	1	1	0	Positive	Positive	1	1	1	1	1	0	Negative
Control_274	1	2013	Yes	1	1	0	0	Positive	Negative	1	1	1	1	1	1	Positive
Surv_275	1	1991	NA	NA	0	0	0	Unknown	Unknown	NA	0	NA	NA	NA	NA	Unknown
Control_275	1	1999	Yes	NA	0	0	1	Unknown	Unknown	NA	0	0	0	0	NA	Unknown
Surv_276	1	2000	Yes	1	1	0	0	Negative	Negative	0	1	0	1	1	1	Positive
Control_276	1	2000	Yes	1	1	0	1	Positive	Positive	1	1	0	1	1	0	Positive
Surv_277	1	2004	Yes	0	1	0	1	Positive	Positive	0	0	0	0	0	0	Negative
Control_277	1	2005	Yes	0	0	0	1	Positive	Positive	0	0	0	0	0	NA	Unknown
Surv_278	1	1987	NA	0	1	1	0	Unknown	Unknown	NA	0	0	0	0	NA	Unknown
Control_278	1	2012	Yes	1	1	1	1	Negative	Negative	0	1	1	1	1	1	Positive
Surv_279	1	2010	Yes	0	0	0	1	Positive	Positive	1	0	0	0	0	0	Negative
Control_279	1	2011	Yes	0	1	1	0	Positive	Positive	1	0	0	0	0	0	Negative
Surv_281	1	1989	NA	NA	1	0	0	Positive	Positive	0	0	NA	NA	NA	NA	Unknown
Control_281	1	1995	NA	NA	0	0	1	Positive	Positive	0	0	NA	NA	NA	NA	Unknown
Surv_282	1	2001	Yes	1	1	0	0	Negative	Negative	0	1	1	1	1	0	Negative
Control_282	1	2001	Yes	1	1	0	0	Negative	Negative	0	1	1	0	1	1	Positive
Surv_285	1	2003	Yes	1	0	0	1	Positive	Positive	1	0	0	0	0	0	Negative
Control_285	1	2002	NA	NA	0	0	0	Unknown	Unknown	NA	0	NA	NA	NA	NA	Unknown
Surv_286	1	2011	Yes	0	1	1	0	Positive	Positive	1	0	0	0	0	0	Negative
Control_286	1	2011	Yes	0	1	0	0	Positive	Positive	1	1	0	1	0	1	Positive
Surv_287	1	2013	Yes	0	0	0	1	Positive	Positive	0	0	0	0	0	0	Negative
Control_287	1	2013	Yes	1	0	0	1	Positive	Positive	1	0	0	0	0	0	Negative
Surv_288	1	2007	Yes	0	1	1	0	Negative	Negative	0	1	1	1	1	0	Negative
Control_288	1	2007	Yes	1	1	1	0	Negative	Negative	0	1	1	1	1	0	Negative
Surv_289	1	2005	Yes	0	1	1	0	Unknown	Unknown	1	0	0	0	0	NA	Unknown
Control_289	1	2012	Yes	0	1	0	0	Negative	Negative	0	0	0	0	0	NA	Unknown
Surv_291	1	1995	Yes	0	1	1	0	Unknown	Unknown	NA	0	0	0	0	NA	Unknown
Control_291	1	1995	Yes	0	1	0	0	Negative	Positive	1	1	1	0	1	NA	Unknown
Surv_292	1	2004	Yes	1	1	1	1	Positive	Positive	1	1	1	1	0	0	Negative
Control_292	1	2002	Yes	1	0	0	1	Positive	Positive	1	1	1	1	1	0	Negative
Surv_293	1	1999	Yes	0	1	1	0	Unknown	Unknown	1	0	0	0	0	NA	Unknown
Control_293	1	2000	Yes	1	0	0	1	Unknown	Unknown	NA	0	0	0	0	NA	Unknown
Surv_294	1	2012	Yes	0	1	1	0	Positive	Positive	0	0	0	0	0	NA	Unknown
Control_294	1	2014	Yes	1	0	0	1	Positive	Positive	0	0	0	0	0	NA	Unknown
Surv_295	1	2012	Yes	0	1	1	0	Positive	Positive	0	0	0	0	0	NA	Unknown
Control_295	1	2013	Yes	0	1	1	1	Positive	Positive	1	0	0	0	0	0	Negative
Surv_296	1	2010	Yes	1	1	1	0	Positive	Positive	1	1	1	1	0	0	Negative
Control_296	1	2012	Yes	1	1	0	0	Positive	Positive	1	1	1	1	1	0	Negative
Surv_297	1	1996	Yes	0	1	0	1	Positive	Positive	0	1	1	0	1	NA	Unknown
Control_297	1	1995	NA	NA	0	0	0	Unknown	NA	NA	0	NA	NA	NA	NA	Unknown
Surv_299	1	1997	Yes	0	1	1	0	Unknown	Unknown	NA	0	0	0	0	NA	Unknown
Control_299	1	1997	Yes	0	1	0	0	Unknown	Unknown	NA	0	0	0	0	NA	Unknown
Surv_300	1	1996	Yes	0	1	1	0	Positive	Negative	1	1	1	0	1	NA	Unknown
Control_300	1	1997	Yes	0	1	0	0	Positive	Negative	0	1	1	0	0	NA	Unknown
Surv_301	1	2011	Yes	1	1	1	1	Positive	Positive	1	1	1	1	1	0	Negative
Control_301	1	2010	No	0	0	0	1	Positive	Positive	1	0	0	0	0	0	Negative
Surv_302	1	1997	No	0	1	1	0	Positive	Positive	1	1	0	1	0	0	Negative
Control_302	1	1999	Yes	1	1	0	0	Positive	Positive	1	1	1	1	1	0	Negative
Surv_303	1	2014	Yes	0	1	0	0	Positive	Negative	1	1	0	1	0	1	Positive
Control_303	1	2014	Yes	0	1	0	0	Positive	Positive	1	1	0	1	0	1	Positive
Surv_304	1	2007	Yes	0	0	0	1	Positive	Positive	0	0	0	0	0	0	Positive
Control_304	1	2007	Yes	1	0	0	1	Positive	Positive	1	0	0	0	0	0	Negative
Surv_305	1	1995	Yes	1	0	0	1	Positive	Positive	1	0	0	0	0	NA	Unknown
Control_305	1	1994	Yes	0	1	0	0	Negative	Negative	0	1	1	0	0	NA	Unknown
Surv_306	1	2004	Yes	0	1	0	0	Positive	Positive	1	0	0	0	0	0	Negative
Control_306	1	2004	Yes	1	0	0	1	Positive	Positive	1	1	1	0	1	0	Negative
Surv_307	1	2013	Yes	0	1	1	0	Positive	Positive	1	1	1	1	0	0	Negative
Control_307	1	2013	Yes	1	0	0	1	Positive	Positive	1	1	1	1	0	0	Negative
Surv_308	1	2003	Yes	0	1	1	0	Positive	Positive	1	1	1	1	1	0	Negative
Control_308	1	2003	No	1	1	0	0	Negative	Negative	0	1	0	1	0	0	Negative
Surv_309	1	2000	Yes	1	1	1	1	Positive	Positive	0	0	0	0	0	0	Negative
Control_309	1	2000	NA	1	0	0	1	Unknown	Unknown	NA	0	0	0	0	NA	Unknown
Surv_310	1	1997	Yes	0	1	1	0	Unknown	Unknown	NA	0	0	0	0	NA	Unknown
Control_310	1	1997	Yes	1	0	0	1	Unknown	Unknown	1	0	0	0	0	NA	Unknown
Surv_311	1	2002	Yes	0	1	1	1	Unknown	Unknown	NA	0	0	0	0	NA	Unknown
Control_311	1	2002	Yes	0	1	0	0	Unknown	Unknown	1	0	0	0	0	NA	Unknown
Surv_312	1	2003	Yes	1	0	0	1	Negative	Negative	0	1	0	1	1	0	Positive
Control_312	1	2003	No	0	1	0	0	Negative	Negative	0	0	0	0	0	0	Negative
Surv_313	1	1998	NA	0	1	1	0	Unknown	Unknown	NA	0	NA	NA	NA	NA	Unknown
Control_313	1	1998	Yes	1	0	0	1	Negative	Negative	0	0	0	0	0	0	Negative
Surv_314	1	1998	Yes	0	1	0	0	Unknown	Unknown	NA	0	0	0	0	NA	Unknown
Control_314	1	1998	NA	0	1	1	0	Unknown	Unknown	NA	0	0	0	0	NA	Unknown
Surv_315	1	1993	NA	1	0	0	0	Negative	Unknown	0	1	1	0	1	NA	Unknown
Control_315	1	1993	Yes	0	1	0	0	Positive	Positive	1	1	1	0	0	0	Negative
Surv_316	1	1995	Yes	0	1	0	0	Negative	Unknown	0	0	0	0	0	NA	Unknown
Control_316	1	1995	Yes	1	0	0	1	Unknown	Unknown	NA	1	1	0	0	NA	Unknown
Surv_317	1	2003	Yes	1	1	1	0	Positive	Positive	1	1	1	0	1	0	Negative
Control_317	1	2002	Yes	1	1	0	0	Positive	Negative	1	1	1	0	1	0	Negative
Surv_318	1	2014	Yes	0	1	0	0	Positive	Positive	1	1	1	1	0	0	Negative
Control_318	1	2014	Yes	1	0	0	1	Positive	Positive	1	1	1	1	1	0	Negative
Surv_319	1	2006	Yes	0	1	1	0	Positive	Positive	1	0	0	0	0	0	Negative
Control_319	1	2006	Yes	1	1	0	0	Positive	Positive	1	1	1	1	1	0	Negative
Surv_320	1	1997	No	1	0	0	1	Negative	Negative	1	1	0	1	0	NA	Unknown
Control_320	1	1995	NA	1	0	0	1	Unknown	Unknown	NA	0	0	0	0	NA	Unknown
Surv_321	1	1998	Yes	0	0	0	1	Positive	Positive	0	0	0	0	0	NA	Unknown
Control_321	1	1996	Yes	1	0	0	1	Negative	Negative	1	1	1	0	0	NA	Unknown
Surv_322	1	2010	Yes	0	1	1	0	Positive	Unknown	0	0	0	0	0	NA	Unknown
Control_322	1	2010	Yes	0	1	1	0	Positive	Positive	0	0	0	0	0	NA	Unknown
Surv_323	1	2006	NA	NA	1	1	0	Unknown	Unknown	NA	0	0	0	0	NA	Unknown
Control_323	1	2006	Yes	1	1	0	1	Positive	Positive	1	1	1	1	1	0	Negative
Surv_324	1	2003	NA	0	1	1	1	Positive	Positive	0	0	0	0	0	0	Negative
Control_324	1	2003	Yes	NA	0	0	0	Positive	Positive	0	1	1	0	1	0	Negative
Surv_325	1	2004	Yes	1	0	0	1	Negative	Negative	0	1	1	1	1	0	Negative
Control_325	1	2003	Yes	1	1	0	1	Negative	Negative	0	1	1	0	1	0	Positive
Surv_326	1	2003	Yes	0	1	1	0	Positive	Positive	0	0	0	0	0	NA	Unknown
Control_326	1	2001	Yes	1	0	0	1	Unknown	Unknown	NA	0	0	0	0	NA	Unknown
Surv_327	1	2014	Yes	0	1	0	0	Negative	Negative	0	1	1	1	0	0	Negative
Control_327	1	2014	Yes	1	0	0	1	Positive	Positive	1	0	0	0	0	0	Negative
Surv_328	1	1992	NA	NA	1	0	0	Negative	Unknown	0	0	NA	NA	NA	NA	Unknown
Control_328	1	1993	No	1	1	0	1	Unknown	Unknown	1	0	0	0	0	NA	Unknown
Surv_329	1	2000	Yes	0	1	0	0	Positive	Negative	1	0	0	0	0	0	Negative
Control_329	1	2001	Yes	1	0	0	1	Positive	Positive	1	1	1	1	1	0	Negative
Surv_331	1	1983	NA	NA	1	0	0	Unknown	Unknown	NA	0	NA	NA	NA	NA	Unknown
Control_331	1	1995	NA	1	1	0	0	Positive	Positive	1	0	0	0	0	0	Negative
Surv_332	1	2008	Yes	0	1	1	0	Positive	Negative	1	0	0	0	0	0	Negative
Control_332	1	2009	Yes	0	1	1	0	Positive	Negative	1	0	0	0	0	0	Negative
Surv_333	1	2008	No	1	1	0	0	Positive	Positive	1	1	0	1	0	0	Negative
Control_333	1	2009	Yes	1	1	0	0	Negative	Negative	0	1	1	1	1	0	Negative
Surv_334	1	2009	Yes	0	1	1	0	Unknown	Unknown	NA	0	0	0	0	NA	Unknown
Control_334	1	2010	Yes	1	0	0	1	Positive	Positive	0	0	0	0	0	0	Negative
Surv_335	1	2013	Yes	1	0	0	1	Positive	Positive	1	1	0	1	0	1	Positive
Control_335	1	2011	Yes	1	1	0	0	Positive	Positive	1	1	0	0	0	1	Positive
Surv_336	1	2009	Yes	1	0	0	1	Positive	Positive	1	0	0	0	0	NA	Unknown
Control_336	1	2009	Yes	1	0	0	1	Positive	Positive	1	0	0	0	0	0	Negative
Surv_337	1	2005	No	1	1	1	1	Negative	Negative	0	1	0	1	0	0	Negative
Control_337	1	2002	Yes	0	1	0	1	Negative	Negative	0	1	1	1	1	0	Negative
Surv_338	1	2005	No	0	1	1	0	Positive	Positive	1	1	0	1	0	0	Negative
Control_338	1	2004	No	0	0	0	0	Unknown	NA	NA	0	0	0	0	NA	Unknown
Surv_339	1	2012	Yes	0	1	1	0	Positive	Positive	1	0	0	0	0	0	Negative
Control_339	1	2012	Yes	1	0	0	1	Negative	Positive	1	1	1	1	1	0	Negative
Surv_340	1	2016	Yes	0	1	1	0	Positive	Negative	1	1	0	1	0	1	Positive
Control_340	1	2016	Yes	1	1	1	0	Positive	Positive	1	0	0	0	0	0	Positive
Surv_341	1	2004	No	0	1	1	0	Positive	Positive	1	1	0	1	1	0	Negative
Control_341	1	2003	No	1	1	0	0	Positive	Positive	1	1	0	1	1	0	Negative
Surv_342	1	1999	NA	NA	1	1	0	Negative	Negative	0	0	NA	NA	NA	0	Negative
Control_342	1	1999	Yes	0	1	0	0	Unknown	Unknown	NA	0	0	0	0	NA	Unknown
Surv_343	1	1999	Yes	0	1	1	0	Negative	Negative	0	1	0	1	1	0	Positive
Control_343	1	1999	Yes	1	0	0	1	Unknown	Unknown	NA	1	1	1	1	NA	Unknown
Surv_344	1	2016	Yes	1	0	0	1	Positive	Positive	1	1	1	1	1	0	Negative
Control_344	1	2016	Yes	1	1	1	0	Positive	Positive	1	1	0	1	1	1	Positive
Surv_345	1	1999	No	0	0	0	1	Negative	Negative	0	1	0	1	1	0	Positive
Control_345	1	2001	Yes	1	1	0	0	Negative	Negative	1	1	1	1	1	1	Positive
Surv_346	1	1991	NA	0	1	0	1	Positive	Unknown	1	1	1	0	1	NA	Unknown
Control_346	1	1993	NA	NA	1	0	0	Positive	Negative	1	0	0	0	0	NA	Unknown
Surv_347	1	2009	Yes	1	0	0	1	Positive	Positive	1	0	0	0	0	0	Negative
Control_347	1	2010	Yes	1	0	0	1	Positive	Positive	1	0	0	0	0	0	Negative
Surv_348	1	2007	Yes	0	1	1	1	Positive	Negative	0	1	0	1	0	0	Positive
Control_348	1	2010	Yes	0	1	1	0	Positive	Positive	1	1	1	1	1	1	Positive
Surv_349	1	2007	Yes	0	1	1	0	Positive	Positive	0	0	0	0	0	0	Positive
Control_349	1	2007	Yes	1	0	0	1	Positive	Positive	0	0	0	0	0	NA	Unknown
Surv_350	1	2002	NA	NA	0	0	1	Positive	Negative	0	0	NA	NA	NA	0	Positive
Control_350	1	2002	NA	NA	0	0	0	Unknown	Unknown	NA	0	NA	NA	NA	NA	Unknown
Surv_351	1	2004	Yes	0	1	1	0	Negative	Negative	0	1	1	1	1	0	Negative
Control_351	1	2005	NA	1	0	0	1	Negative	Negative	0	0	0	0	0	0	Negative
Surv_353	1	2004	Yes	0	1	0	0	Positive	Negative	1	1	1	1	1	0	Negative
Control_353	1	2004	No	0	1	0	0	Positive	Positive	0	0	0	0	0	0	Negative
Surv_354	1	2003	Yes	1	1	1	0	Positive	Positive	1	1	1	1	1	0	Negative
Control_354	1	2003	Yes	1	0	0	1	Positive	Negative	1	1	1	1	1	0	Positive
Surv_355	1	2007	Yes	0	1	1	0	Unknown	Unknown	NA	0	0	0	0	NA	Unknown
Control_355	1	2009	Yes	0	1	1	0	Positive	Positive	0	0	0	0	0	0	Negative
Surv_356	1	2000	Yes	0	1	1	1	Positive	Positive	1	1	1	1	1	0	Positive
Control_356	1	2001	Yes	1	0	0	1	Positive	Positive	1	1	1	0	1	0	Negative
Surv_357	1	2001	Yes	1	0	0	1	Positive	Positive	1	1	1	0	0	0	Negative
Control_357	1	2000	Yes	1	1	0	0	Negative	Negative	0	1	1	1	1	0	Positive
Surv_358	1	2003	Yes	1	1	1	0	Positive	Positive	1	1	1	1	1	0	Negative
Control_358	1	2003	NA	NA	0	0	0	Unknown	Unknown	NA	0	NA	NA	NA	NA	Unknown
Surv_359	1	2001	No	1	0	0	1	Negative	Negative	0	1	0	1	1	0	Negative
Control_359	1	2001	Yes	1	0	0	1	Negative	Negative	0	1	1	1	1	0	Negative
Surv_360	1	1998	Yes	0	1	1	0	Unknown	Unknown	NA	0	0	0	0	NA	Unknown
Control_360	1	1998	Yes	1	0	0	1	Unknown	Unknown	1	0	0	0	0	NA	Unknown
Surv_361	1	2015	Yes	0	1	1	0	Positive	Positive	0	0	0	0	0	NA	Unknown
Control_361	1	2015	Yes	0	1	0	0	Positive	Unknown	1	0	0	0	0	NA	Unknown
Surv_362	1	1997	NA	NA	1	0	1	Unknown	Unknown	NA	0	NA	NA	NA	NA	Unknown
Control_362	1	1997	NA	NA	0	0	0	Unknown	Unknown	NA	0	NA	NA	NA	NA	Unknown
Surv_363	1	2013	Yes	1	0	0	1	Positive	Positive	1	0	0	0	0	NA	Unknown
Control_363	1	2013	Yes	0	1	0	0	Positive	Positive	0	0	0	0	0	NA	Unknown
Surv_364	1	2003	Yes	0	1	1	0	Negative	Negative	1	1	1	0	0	0	Negative
Control_364	1	2003	Yes	0	1	0	0	Positive	Positive	1	0	0	0	0	0	Negative
Surv_365	1	2006	Yes	0	1	1	1	Positive	Positive	0	0	0	0	0	NA	Unknown
Control_365	1	2009	Yes	1	0	0	1	Positive	Negative	0	0	0	0	0	0	Negative
Surv_366	1	2013	No	0	1	1	0	Negative	Positive	0	1	0	0	0	0	Negative
Control_366	1	2013	Yes	0	1	1	0	Positive	Positive	1	0	0	0	0	0	Negative
Surv_367	1	2013	Yes	0	1	1	0	Negative	Negative	0	0	0	0	0	NA	Unknown
Control_367	1	2017	Yes	0	1	1	0	Negative	Negative	0	0	0	0	0	NA	Unknown
Surv_368	1	2013	Yes	0	1	1	0	Positive	Positive	0	0	0	0	0	0	Negative
Control_368	1	2013	Yes	1	0	0	1	Positive	Positive	1	1	1	1	0	0	Negative
Surv_369	1	2010	Yes	0	1	1	0	Unknown	Unknown	NA	0	0	0	0	NA	Unknown
Control_369	1	2011	Yes	0	1	1	0	Unknown	Unknown	NA	0	0	0	0	NA	Unknown
Surv_370	1	2012	Yes	1	1	1	0	Negative	Negative	1	1	0	1	0	0	Negative
Control_370	1	2010	Yes	1	1	0	0	Negative	Negative	0	1	1	1	1	0	Positive
Surv_371	1	2010	Yes	0	1	1	0	Positive	Positive	0	0	0	0	0	NA	Unknown
Control_371	1	2011	Yes	NA	0	0	0	Unknown	Unknown	NA	0	NA	NA	NA	NA	Unknown

## Sheet: Supplementary Figure 2
ID	SOC	Physician did not feel patient could tolerate	Regimen not listed in guidelines	Patient refused treatment
Surv_7	N	Yes	No	No
Surv_10	N	No	Yes	No
Surv_232	N	No	Yes	No
Surv_235	N	No	No	Yes
Surv_240	N	No	Yes	No
Surv_245	N	No	No	Yes
Surv_19	N	No	Yes	No
Surv_261	N	No	No	Yes
Surv_22	N	Yes	No	No
Surv_302	N	No	Yes	No
Surv_320	N	No	Yes	No
Surv_333	N	No	Yes	No
Surv_337	N	No	Yes	No
Surv_338	N	No	Yes	No
Surv_341	N	No	Yes	No
Surv_345	N	No	Yes	No
Surv_359	N	No	Yes	No
Surv_366	N	No	Yes	No
Surv_30	N	No	Yes	No
Surv_53	N	No	Yes	No
Surv_54	N	No	Yes	No
Surv_56	N	No	Yes	No
Surv_132	N	No	Yes	No
Surv_133	N	No	No	Yes
Surv_157	N	No	Yes	No
Surv_191	N	No	No	Yes
Surv_18	N	No	No	Yes
Control_232	N	No	Yes	No
Control_234	N	No	Yes	No
Control_301	N	No	No	Yes
Control_60	N	No	Yes	No
Control_312	N	Yes	No	No
Control_328	N	No	Yes	No
Control_161	N	No	No	Yes
Control_341	N	No	Yes	No
Control_185	N	No	No	Yes
Control_27	N	No	Yes	No
Control_42	N	No	Yes	No
Control_55	N	No	Yes	No
Control_186	N	No	Yes	No
Control_188	N	No	Yes	No
Control_200	N	No	Yes	No
Control_205	N	No	Yes	No
Control_197	N	No	Yes	No
